# Supplementary material for: Comorbidities in patients with migraine in Japan: a cross-sectional study using data from National Health and Wellness Survey
Source: PubMed Central journal article supplement — BMJ Open. 2022 Nov 30;12(11):e065787. doi: 10.1136/bmjopen-2022-065787 (PMC9716839; doi:10.1136/bmjopen-2022-065787), 2022-11-30
Supplement: bmjopen-2022-065787.draft_revisions.pdf [file bmjopen-2022-065787.draft_revisions.pdf]

# BMJ Open

BMJ Open is committed to open peer review. As part of this commitment we make the peer review history of every article we publish publicly available.

When an article is published we post the peer reviewers' comments and the authors' responses online. We also post the versions of the paper that were used during peer review. These are the versions that the peer review comments apply to.

The versions of the paper that follow are the versions that were submitted during the peer review process. They are not the versions of record or the final published versions. They should not be cited or distributed as the published version of this manuscript.

BMJ Open is an open access journal and the full, final, typeset and author-corrected version of record of the manuscript is available on our site with no access controls, subscription charges or pay-per-view fees (<http://bmjopen.bmj.com>).

If you have any questions on BMJ Open's open peer review process please email [info.bmjopen@bmj.com](mailto:info.bmjopen@bmj.com)

# BMJ Open

## Comorbidities in Patients with Migraine in Japan: A Cross-sectional Study Using Data from National Health and Wellness Survey

|                               |                                                                                                                                                                                                                                                                             |
|-------------------------------|-----------------------------------------------------------------------------------------------------------------------------------------------------------------------------------------------------------------------------------------------------------------------------|
| Journal:                      | <i>BMJ Open</i>                                                                                                                                                                                                                                                             |
| Manuscript ID                 | bmjopen-2022-065787                                                                                                                                                                                                                                                         |
| Article Type:                 | Original research                                                                                                                                                                                                                                                           |
| Date Submitted by the Author: | 17-Jun-2022                                                                                                                                                                                                                                                                 |
| Complete List of Authors:     | Kikui, Shoji; Tominaga Hospital, Department of Neurology & Headache Center<br>Chen, Yirong; Cerner Enviza<br>Ikeda, Ken; Amgen K.K<br>Hasebe, Miki; Amgen K.K.<br>Asao, Keiko; Amgen K.K.<br>Takeshima, Takao; Tominaga Hospital, Department of Neurology & Headache Center |
| Keywords:                     | Migraine < NEUROLOGY, PUBLIC HEALTH, Quality in health care < HEALTH SERVICES ADMINISTRATION & MANAGEMENT                                                                                                                                                                   |
|                               |                                                                                                                                                                                                                                                                             |

SCHOLARONE™  
Manuscripts

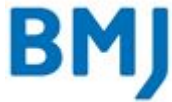

I, the Submitting Author has the right to grant and does grant on behalf of all authors of the Work (as defined in the below author licence), an exclusive licence and/or a non-exclusive licence for contributions from authors who are: i) UK Crown employees; ii) where BMJ has agreed a CC-BY licence shall apply, and/or iii) in accordance with the terms applicable for US Federal Government officers or employees acting as part of their official duties; on a worldwide, perpetual, irrevocable, royalty-free basis to BMJ Publishing Group Ltd ("BMJ") its licensees and where the relevant Journal is co-owned by BMJ to the co-owners of the Journal, to publish the Work in this journal and any other BMJ products and to exploit all rights, as set out in our [licence](#).

The Submitting Author accepts and understands that any supply made under these terms is made by BMJ to the Submitting Author unless you are acting as an employee on behalf of your employer or a postgraduate student of an affiliated institution which is paying any applicable article publishing charge ("APC") for Open Access articles. Where the Submitting Author wishes to make the Work available on an Open Access basis (and intends to pay the relevant APC), the terms of reuse of such Open Access shall be governed by a Creative Commons licence – details of these licences and which [Creative Commons](#) licence will apply to this Work are set out in our licence referred to above.

Other than as permitted in any relevant BMJ Author's Self Archiving Policies, I confirm this Work has not been accepted for publication elsewhere, is not being considered for publication elsewhere and does not duplicate material already published. I confirm all authors consent to publication of this Work and authorise the granting of this licence.

1  
2  
3 **Title: Comorbidities in Patients with Migraine in Japan: A Cross-sectional Study Using**  
4  
5 **Data from National Health and Wellness Survey**  
6  
7  
8  
9

10 **Authors:** Shoji Kikui<sup>1</sup>, Yirong Chen<sup>2</sup>, Ken Ikeda<sup>3</sup>, Miki Hasebe<sup>3</sup>, Keiko Asao<sup>3</sup>, Takao  
11  
12 Takeshima<sup>1\*</sup>  
13  
14

15  
16  
17 **\* Corresponding author:**  
18

19 Takao Takeshima  
20

21 Address: Department of Neurology & Headache Center, Tominaga Hospital, 1-4-48  
22

23 Minatomiachi, Naniwa-ku, Osaka 556-0017, Japan  
24

25 Email: [ttakeshi@tominaga.or.jp](mailto:ttakeshi@tominaga.or.jp)  
26  
27  
28  
29

30  
31 **Affiliations:**  
32

- 33 1. Department of Neurology & Headache Center, Tominaga Hospital, 1-4-48  
34 Minatomiachi, Naniwa-ku, Osaka 556-0017, Japan.  
35  
36 2. Cerner Enviza, 83 Clemenceau Avenue, #04-101, UE Square, Singapore 239920,  
37 Singapore.  
38  
39 3. Amgen K.K., Midtown Tower, 9-7-1 Akasaka, Minato-ku, Tokyo 107-6239, Japan.  
40  
41  
42  
43  
44  
45  
46

47 **Word count: 2,718 words**  
48  
49  
50  
51  
52  
53  
54  
55  
56  
57  
58  
59  
60

**ABSTRACT (250 WORDS)**

*Objectives* – This study aims to examine the association between migraine and various psychiatric and somatic comorbidities in Japan.

*Design* – Cross-sectional study using existing data of the 2017 Japan National Health and Wellness Survey (NHWS).

*Setting* – Nationally representative sample of persons (in terms of age and gender) living in the general community aged 18 years or older in Japan.

*Participants* – Out of a sample of 30,001 NHWS respondents, 378 respondents were identified as migraine patients and 25,209 were identified as non-migraine patients. After propensity score (PS)-matching (1:4), 1,512 matched non-migraine respondents were identified.

*Primary and secondary outcome measures* – Prevalence and PS-matched prevalence odds-ratio (POR) were assessed for each psychiatric and somatic comorbidity among migraine patients and matched non-migraine respondents (including migraine patients with less than 15 monthly headache days [MHDs] and migraine patients with more than 15 MHDs).

*Results* – Migraine patients were predominately female and had significantly higher prevalence than matched non-migraine respondents to have psychiatric and somatic comorbidities. Psychiatric comorbidities with >5% prevalence among migraine patients included depression, posttraumatic stress disorder, and anxiety disorders, while gastrointestinal disorders were the most prevalent somatic comorbidity category. Other somatic comorbidities included allergies, insomnia, pre-menstrual syndrome, and anemia. Migraine patients with more than 15 MHDs tended to have higher point estimates for POR.

*Conclusion* – Psychiatric and somatic conditions were more prevalent in migraine patients than matched non-migraine respondents, some being novel associations not previously reported in

1  
2  
3 Japan. This study provided insights on comorbidities which could complicate care, clinical  
4  
5 practice, and outcomes among migraine patients.  
6  
7

8 *Keywords* - Comorbidities; Migraine; Prevalence Odds-ratio; Health Survey  
9

10  
11 *Trial registration* – Not applicable  
12  
13  
14  
15  
16

## 17 **ARTICLE SUMMARY**

### 18 **Strengths and limitations**

- 19  
20  
21  
22  
23 • An age-and-gender-stratified sampling frame was imposed during the recruitment to  
24 ensure and reflection of the general adult population of Japan in terms of age and  
25 gender.  
26  
27
- 28  
29  
30 • The study identified potential psychiatric and somatic comorbidities from self-reported  
31 medical history of migraine patients as well as several covariates including  
32 sociodemographic factors, general health characteristics and migraine-specific  
33 covariates  
34  
35
- 36  
37  
38 • This study uses an online survey and thus respondents without internet access were not  
39 included in the study  
40  
41
- 42  
43  
44 • This study assessed respondents' self-declaration of migraine manifestation and  
45 comorbidities which may bias the prevalence odds-ratio and the causal relationship  
46 between migraine and comorbidities cannot be concluded  
47  
48  
49  
50  
51  
52  
53  
54  
55  
56  
57  
58  
59  
60

## INTRODUCTION

Migraine is a common debilitating neurological disorder that is highly prevalent globally.[1] In Japan, the estimated prevalence of migraine among the general population was 6% in 2004,[2] and more recently, 9% among working, socially active individuals in the Tokyo metropolitan area.[3]

Previous reports demonstrated that approximately 90% of chronic migraine patients have at least one comorbidity.[4] The previously reported comorbidities of migraine include various psychiatric[5–7] and somatic conditions such as cardiovascular disorders,[8–10] gastrointestinal disorders,[10–13] allergy-related disorders,[10,14,15] sleep disorders,[10,16,17] and gynecological disorders.[18] A nationwide population-based study in the United States reported an association between migraine comorbidities and the intensity of headache pain and frequency.[10]

In Japan, there is an evidence gap on the comorbidities of migraine. Although there were a few studies investigating the comorbidities of migraine in Japan, previous studies primarily focused on one disease or one category of diseases.[19,20] To our knowledge, no studies have been published that assess for a range of comorbidities of migraine referencing non-migraine individuals in Japan.

Therefore, the objective of this study was to examine the association between migraine and a range of psychiatric and somatic comorbidities in Japan by assessing the prevalence odds ratio (POR) between migraine and these comorbidities, with referencing to non-migraine individuals. The findings from this study may provide insights to the etiology of migraine and help physicians and patients with effective migraine management and treatment.

## METHODS

This study utilized existing data collected from a cross-sectional online survey, the 2017 Japan National Health and Wellness Survey (NHWS). Individuals aged 18 years or older were recruited to the NHWS through an existing, general-purpose (i.e., not healthcare-specific) web-based consumer panel. All panelists explicitly agreed to join the panel and receive periodic invitations to participate in online surveys. An age-and-gender-stratified sampling frame, based on Japan governmental census data, was imposed during the recruitment from the panelists. This was to ensure representativeness of panelists who completed the NHWS to reflect the general adult population of Japan in terms of age and gender.

The NHWS was granted exemption status upon review by the Pearl Pathways Institutional Review Board (IN, US). All NHWS respondents provided informed consent prior to participation. This analysis was granted exemption by the Public Health Research Foundation Ethical Review Committee (Tokyo, Japan).

### Study Population

Migraine patients in this study were defined by ICHD-3 (International Classification of Headache Disorders, 3<sup>rd</sup> Edition)-like criteria which was detailed in a previous publication using the same data,[21] among respondents who self-reported migraine in the past 12 months and self-reported having at least 4 monthly headache days (MHDs) (Figure 1). The ICHD-3 like criteria was based on the diagnostic criteria from ICHD-3 but modified for the variables available in the existing NHWS data.[21] Respondents having migraine without aura or migraine with aura, as per the ICHD-3 like criteria, and having at least 4 MHDs, were identified as migraine patients in this study. Respondents who did not self-report migraine were classified as non-migraine respondents.



### *Patient and Public Involvement*

Respondents and/or the public were not involved in the design, or conduct, or reporting, or dissemination plans of our research.

### **Covariate and Outcome Assessment**

Sociodemographic and general health characteristics variables measured in this study included age, gender, marital status, level of education, household income, region, insurance type, employment status, Charlson comorbidity index (CCI),<sup>[22]</sup> body mass index (BMI), smoking status, alcohol use, and exercise behavior. Migraine-specific covariates were assessed using the Headache Impact Test-6 (HIT-6). The HIT-6 measures the impact of headaches on the respondents' ability to function in social situations including home and work. Higher HIT-6 depicts greater functional impairment.<sup>[23]</sup>

A list of potential psychiatric and somatic comorbidities was created from the self-reported medical history of the NHWS respondents (refer to full list in Figure 2 and Figure 3). The list includes diseases for which the associations with migraine have been reported; diseases for which the association may be explained from the pathophysiology; and other conditions of special interest related to treatment choices. All respondents answered the questions "Have you ever experienced ..." or "Have you experienced ... in the past 12 months" depending on the condition in NHWS.

## Statistical Analysis

Sociodemographic and health characteristics were summarized using counts and percentages for categorical variables and means and standard deviations (SDs) for continuous variables for migraine patients and non-migraine respondents.

Propensity score (PS) matching with 1:4 ratio of migraine patients to non-migraine respondents, using a greedy matching algorithm was conducted to create a matched comparison group of non-migraine respondents. Sociodemographic (age, gender, marital status, education, household income, region, insurance, and employment status) and general health characteristics (BMI, smoking status, alcohol use and exercise behavior) were used in the matching. Balance of matching were assessed using standardized mean differences (SMDs) between migraine patients and matched non-migraine respondents. Standardized mean differences greater than 0.1 were considered unbalanced after matching.

Prevalence of the selected psychiatric and somatic comorbidities among migraine patients and matched non-migraine respondents were calculated. Then, PS-matched prevalence odds-ratio (POR) and its 95% confidence intervals (CI) for each comorbidity were calculated to evaluate the potential associations of these conditions with migraine.

A post-hoc subgroup analysis was conducted among migraine patients with less than 15 MHDs (episodic migraine) and their respective matched non-migraine respondents, as well as among migraine patients with at least 15 MHDs (chronic migraine) and their respective matched non-migraine respondents.

All statistical analyses were performed using IBM SPSS version 25 and R3.5.1. No correction for multiple testing was conducted as the study was out of exploratory nature and no formal hypothesis testing was planned. P-values were provided as an indication of the difference between migraine patients and non-migraine respondents.

## RESULTS

### Participant demographics and health characteristics

A total of 30,001 respondents aged 18 years and older provided informed consent and participated in the 2017 Japan NHWS. Among these respondents, 378 respondents were identified as migraine patients and 25,209 respondents were identified as non-migraine respondents (Figure 1).

After PS matching, a total of 1,512 non-migraine respondents were identified and matching was found to be balanced between matched non-migraine respondents and migraine patients, with all SMDs less than 0.1 (Table 1).

### Sociodemographic and general health characteristics of migraine patients and matched non-migraine respondents are described in Table 1.

Migraine patients (N=378) had an average age of 41.6 and were predominantly females (79.9%). The majority (83.6%) of migraine patients in this study had severe impact (HIT-6 score: 60-78). The CCI, which was not part of the PS matching, was higher in migraine patients than matched non-migraine respondents (mean: 0.24 vs. 0.08).

**Table 1. Sociodemographic and general health characteristics among migraine patients and matched non-migraine respondents**

|                 | Migraine patients<br>(N=378) |       | Matched non-<br>migraine respondents<br>(N=1,512) |       | SMD   |
|-----------------|------------------------------|-------|---------------------------------------------------|-------|-------|
|                 | %                            | Count | %                                                 | Count |       |
| Age [Mean (SD)] | 41.6 (12.7)                  |       | 41.2 (15.2)                                       |       | 0.026 |

|                                   |                                                                         |             |     |             |       |       |
|-----------------------------------|-------------------------------------------------------------------------|-------------|-----|-------------|-------|-------|
| Gender                            | <i>Male</i>                                                             | 20.1%       | 76  | 20.0%       | 303   | 0.002 |
|                                   | <i>Female</i>                                                           | 79.9%       | 302 | 80.0%       | 1,209 |       |
| Marital status                    | <i>Married or living with partner</i>                                   | 48.9%       | 185 | 49.0%       | 741   | 0.001 |
|                                   | <i>Divorced/ Separated/ Widowed/ Decline to answer</i>                  | 51.1%       | 193 | 51.0%       | 771   |       |
|                                   |                                                                         |             |     |             |       |       |
| Level of education                | <i>Completed university education</i>                                   | 41.3%       | 156 | 43.2%       | 653   | 0.042 |
|                                   | <i>Not completed</i>                                                    | 46.6%       | 176 | 44.6%       | 674   |       |
|                                   | <i>Decline to answer</i>                                                | 12.2%       | 46  | 12.2%       | 185   |       |
| Household income                  | <i>&lt;¥3,000,000</i>                                                   | 19.6%       | 74  | 18.9%       | 286   | 0.029 |
|                                   | <i>¥3,000,000 to &lt;¥5,000,000</i>                                     | 27.0%       | 102 | 27.6%       | 417   |       |
|                                   | <i>¥5,000,000 to &lt;¥8,000,000</i>                                     | 24.6%       | 93  | 23.9%       | 361   |       |
|                                   | <i>¥8,000,000 or more</i>                                               | 14.8%       | 56  | 15.4%       | 233   |       |
|                                   | <i>Decline to answer</i>                                                | 14.0%       | 53  | 14.2%       | 215   |       |
| Region                            | <i>Hokkaido</i>                                                         | 3.2%        | 12  | 2.9%        | 44    | 0.063 |
|                                   | <i>Tohoku</i>                                                           | 6.6%        | 25  | 7.1%        | 107   |       |
|                                   | <i>Kanto</i>                                                            | 39.4%       | 149 | 40.7%       | 615   |       |
|                                   | <i>Chubu</i>                                                            | 14.6%       | 55  | 14.6%       | 221   |       |
|                                   | <i>Kansai/Kinki</i>                                                     | 18.8%       | 71  | 16.9%       | 255   |       |
|                                   | <i>Chugoku</i>                                                          | 4.2%        | 16  | 4.4%        | 67    |       |
|                                   | <i>Shikoku</i>                                                          | 3.2%        | 12  | 3.7%        | 56    |       |
|                                   | <i>Kyushu/Okinawa</i>                                                   | 10.1%       | 38  | 9.7%        | 147   |       |
| Insurance type                    | <i>National health insurance</i>                                        | 52.1%       | 197 | 50.8%       | 768   | 0.034 |
|                                   | <i>Social insurance</i>                                                 | 44.7%       | 169 | 46.1%       | 697   |       |
|                                   | <i>Other (Late-stage elderly insurance / Other / None of the above)</i> | 3.2%        | 12  | 3.1%        | 47    |       |
|                                   |                                                                         |             |     |             |       |       |
| Employment status                 | <i>Currently not employed</i>                                           | 39.9%       | 151 | 40.6%       | 614   | 0.013 |
|                                   | <i>Currently employed</i>                                               | 60.1%       | 227 | 59.4%       | 898   |       |
| BMI                               | <i>Underweight (BMI&lt;18.5)</i>                                        | 18.3%       | 69  | 18.5%       | 280   | 0.045 |
|                                   | <i>Normal weight (18.5≤BMI&lt;25)</i>                                   | 62.4%       | 236 | 59.7%       | 903   |       |
|                                   | <i>Pre-obese (25≤BMI&lt;30)</i>                                         | 14.8%       | 56  | 13.6%       | 205   |       |
|                                   | <i>Obese (BMI≥30)</i>                                                   | 4.5%        | 17  | 4.0%        | 61    |       |
|                                   | <i>Decline to answer</i>                                                | 4.2%        | 16  | 4.2%        | 63    |       |
| Smoking status                    | <i>Never smoker</i>                                                     | 55.8%       | 211 | 56.7%       | 858   | 0.045 |
|                                   | <i>Former smoker</i>                                                    | 20.9%       | 79  | 19.1%       | 289   |       |
|                                   | <i>Current smoker</i>                                                   | 23.3%       | 88  | 24.1%       | 365   |       |
| Alcohol use                       | <i>Abstain</i>                                                          | 40.5%       | 153 | 40.8%       | 617   | 0.007 |
|                                   | <i>Currently consume alcohol</i>                                        | 59.5%       | 225 | 59.2%       | 895   |       |
| Vigorous exercise in past 30 days | <i>No</i>                                                               | 58.2%       | 220 | 60.0%       | 907   | 0.036 |
|                                   | <i>Yes</i>                                                              | 41.8%       | 158 | 40.0%       | 605   |       |
| CCI* [Mean (SD)]                  |                                                                         | 0.24 (0.86) |     | 0.08 (0.33) |       | 0.242 |
| HIT-6 impact grades*              | <i>Little-to-no impact (HIT-6 score: 36-49)</i>                         | 1.1%        | 4   | -           | -     | -     |
|                                   | <i>Moderate impact (HIT-6 score: 50-55)</i>                             | 6.6%        | 25  | -           | -     | -     |
|                                   | <i>Substantial impact (HIT-6 score: 56-59)</i>                          | 8.7%        | 33  | -           | -     | -     |
|                                   | <i>Severe impact (HIT-6 score: 60-78)</i>                               | 83.6%       | 316 | -           | -     | -     |

BMI, body mass index; CCI, Charlson comorbidity index; SMD, standardized mean difference.

\* CCI and HIT-6 impact grades are not included in the propensity score matching.

### **Psychiatric comorbidities in migraine patients vs. matched non-migraine respondents**

#### **(Figure 2)**

The psychiatric comorbidities with prevalence higher than 5.0% in migraine patients were depression (22.2%), post-traumatic stress disorder (PTSD) (7.7%), anxiety disorders (6.1% for phobias to 14.6% for anxiety), and obsessive-compulsive disorder (OCD) (5.0%).

Among the comorbidities with relatively high prevalence (5.0% or higher) in migraine patients, migraine patients had a significantly higher odds than matched non-migraine respondents for PTSD (PS-matched POR [95% CI]: 11.3 [5.4, 25.4]), various anxiety disorders (generalized anxiety disorder (GAD): 9.9 [5.1, 20.3] to social anxiety disorder (4.9 [3.0, 7.8]), OCD (5.3 [2.5, 11.3]), and depression (2.9 [2.1, 3.9]).

### **Somatic comorbidities in migraine patients vs. matched non-migraine respondents**

#### **(Figure 3)**

##### *Gastrointestinal comorbidities*

Most of the gastrointestinal comorbidities assessed in this study showed the prevalence higher than 5.0% in migraine patients: heartburn (42.6%), chronic constipation (28.8%), frequent diarrhea (26.2%), gastroesophageal reflux disease (GERD) (20.6%), irritable bowel syndrome (19.8%), and ulcers (11.4%).

Among the gastrointestinal comorbidities with relatively high prevalence, compared with matched non-migraine respondents, migraine patients had a significantly higher odds for irritable bowel syndrome (PS-matched POR [95% CI]: 3.8 [2.7, 5.4]), heartburn (3.6 [2.8, 4.7]),

1  
2  
3 GERD (3.5 [2.5, 4.8]), ulcers (3.1 [2.0, 4.8]), frequent diarrhea (3.1 [2.3, 4.1]) and chronic  
4  
5 constipation (2.5 [1.9, 3.3]).  
6  
7

#### 8 *Allergy-related comorbidities*

9  
10 All the allergy-related comorbidities assessed in this study have a prevalence higher than 5.0%  
11  
12 in migraine patients: allergies (43.1%), hay fever (44.2%), atopic dermatitis (19.6%), and  
13  
14 asthma (17.5%).  
15  
16

17  
18 Compared with matched non-migraine respondents, migraine patients had a significantly  
19  
20 higher odds for allergies (PS-matched POR [95% CI]: 3.0 [2.3, 3.8]), hay fever (2.9 [2.2, 3.6]),  
21  
22 asthma (2.2 [1.6, 3.1]), and atopic dermatitis (2.0 [1.5, 2.7]).  
23  
24  
25

#### 26 *Sleep comorbidities*

27  
28 The following sleep disorders presented in migraine patients with a prevalence higher than  
29  
30 5.0% included insomnia (35.4%) and sleep difficulties (12.7%). Migraine patients had a  
31  
32 significantly higher odds for insomnia (PS-matched POR [95% CI]: 4.3 [3.3, 5.7]) and sleep  
33  
34 difficulties (4.1 [2.7, 6.3]), compared to matched non-migraine respondents.  
35  
36  
37

#### 38 *Gynecological comorbidities*

39  
40 The gynecological disorders assessed in this study with a prevalence higher than 5.0% among  
41  
42 migraine patients were pre-menstrual syndrome (32.1%), pre-menstrual dysphoric disorder  
43  
44 (19.9%), fibroid (13.0%), and endometriosis (9.5%). Compared with matched non-migraine  
45  
46 respondents, migraine patients had a significantly higher odds for pre-menstrual dysphoric  
47  
48 disorder (PS-matched POR [95% CI]: 5.5 [3.6, 8.4]), pre-menstrual syndrome (5.3 [3.8, 7.4]),  
49  
50 endometriosis (2.4 [1.5, 3.7]), and fibroids (1.8 [1.2, 2.6]).  
51  
52  
53  
54

#### 55 *Cardiovascular comorbidities*

56  
57 The cardiovascular disorders assessed in this study showed a lower than 5.0% prevalence  
58  
59 among migraine patients except for high blood pressure (hypertension) (7.4%). Compared with  
60

1  
2  
3 matched non-migraine respondents, the odds of having hypertension, heart attack, stroke, or  
4 mini-stroke/transient ischemic attack (TIA) were not significantly different in migraine  
5  
6 patients.  
7  
8  
9

### 10 *Other comorbidities*

11  
12 Most other disorders assessed in this study showed the prevalence lower than 5.0% among  
13 migraine patients except for anemia (23.3%), thyroid condition (5.8%), and restless leg  
14  
15 syndrome (5.8%). Compared with matched non-migraine respondents, migraine patients had a  
16 significantly higher odds for restless leg syndrome (PS-matched POR [95% CI]: 2.9 [1. 6, 5.1]),  
17  
18 thyroid condition (2.9 [1. 6, 5.1]) and anemia (2.3 [1.7, 3.1]). Compared with matched non-  
19  
20 migraine respondents, migraine patients had a significantly higher odds for fibromyalgia  
21  
22 (prevalence among migraine patients: 1.6%; POR [95% CI]: 12.2 [2.2, 123.7]). For all other  
23  
24 disorders assessed in this study (rheumatoid arthritis, lupus, Parkinson's disease, epilepsy,  
25  
26 genital herpes, genital warts, and breast cancer), the odds among migraine patients were not  
27  
28 different from matched non-migraine respondents.  
29  
30  
31  
32  
33  
34  
35  
36  
37  
38  
39

### 40 **Post-hoc subgroup analysis by MHDs**

41  
42 Majority of the baseline characteristics remained balanced at the subgroup level (results not  
43  
44 shown). Post-hoc analysis demonstrated consistent results in both subgroups of the migraine  
45  
46 patients  $MHDs < 15$  and  $MHDs \geq 15$  with the overall analysis. The most prevalent psychiatric  
47  
48 and somatic comorbidities were similar in both migraine patients with  $MHDs < 15$  and migraine  
49  
50 patients with  $MHDs \geq 15$  (Supplementary Tables 1 and 2).  
51  
52  
53

54  
55 Migraine patients with  $MHDs \geq 15$  tended to have higher point estimates for POR although  
56  
57 formal statistical testing was not performed to assess the interaction for the association between  
58  
59 comorbidities and migraine by MHD.  
60

## DISCUSSION

This study showed that patients with migraine have a significantly higher prevalence for various psychiatric and somatic comorbidities, compared with matched non-migraine respondents. Our study is the first to report the broad range of comorbidities associated with migraine as a population-based study in Japan.

Potential pathological mechanisms for comorbidities were proposed – for example, uni- or bi-directional causality or shared environmental or genetic risk factors. Although various explanations for the association between migraines and psychiatric conditions have been proposed, exact causal relationships and mechanisms for the associations are yet to be elucidated.

### Psychiatric comorbidities

Psychiatric disorders that our study found associated with migraine such as PTSD, anxiety disorders, OCD and depression have been described in previous literature.[5–7] Associations between migraines and psychiatric conditions have been hypothesized for neurotransmitters, such as serotonin, and ovarian hormonal influences, which might lead to serotonergic processing dysfunction and hypothalamic-pituitary-adrenal (HPA) axis dysregulation.[24] A genome-wide association study with over 1 million individuals found significantly overlapped genetic risks of migraine with psychiatric conditions such as attention-deficit/hyperactivity disorder (ADHD) or depression.[25]



## Somatic comorbidities

### *Gastrointestinal comorbidities*

We found that bowel movement dysregulations such as constipation, diarrhea, and irritable bowel syndrome, are more prevalent in migraine patients than matched non-migraine respondents, which was consistent with previous literature.[11–13] Autonomic nervous system dysfunction and other mechanisms such as dysregulation of neuroendocrine, immunological factors, the brain-gut axis, or intestinal microbiota[12] were thought as potential mechanisms to alter visceral sensitivity and common pathology with migraine.

Both GERD[13] and gastric ulcer[10,13] were shown to have higher prevalence in migraine patients than matched non-migraine respondents in this study. Association of migraine with *Helicobacter pylori* infection has been shown in a meta-analysis of observational studies,[26] and this may explain the high prevalence of GERD and gastric ulcer in migraine patients[12] Other possible explanations for the association between migraine and gastrointestinal disorders includes analgesics use in migraine patients.[12,15]

### *Allergy-related comorbidities*

In this study, migraine patients were more likely to have allergy-related comorbidities, which are consistent with previous research.[10,14,15] The association between migraine and allergy-related comorbidities could in part be due to common pathophysiology of inflammatory, immune, and genetic factors.[14]

### *Sleep comorbidities*

Migraine patients in this study had a significantly increased prevalence for sleep disorders including insomnia and sleep difficulties, compared to non-migraine respondents, consistent with previous studies.[10,16,17] The association between migraine and sleep disorders is thought to be bidirectional: headache was shown to be a risk factor for insomnia, while

1  
2  
3 insomnia could be a contributing factor of migraine attacks. A large population-based study  
4 reported that those with comorbid migraine and poor sleep showed significantly poorer anxiety  
5 and depression scores.[17]  
6  
7  
8  
9

### 10 *Gynecological comorbidities*

11 Headache has been known to be a common symptom for perimenstrual syndrome.[27]  
12  
13 Furthermore, the association between endometriosis and migraine was previously reported.[18]  
14  
15 The findings from the present study were consistent with the previous research. The association  
16 between migraines and gynecological comorbidities could be due to hormonal changes in  
17 women throughout the menstrual cycle or during menopause which may cause migraine  
18 through estrogen-mediated pathways including the association of estrogen receptor markers  
19 from genetic studies.[28]  
20  
21  
22  
23  
24  
25  
26  
27  
28  
29

### 30 *Cardiovascular comorbidities*

31 Previous studies pointed out the association between migraine and cardiovascular conditions  
32 such as hypertension,[10] myocardial infarction[9,10] and stroke,[8–10] and the association  
33 specifically on migraine with aura[8,9] or other risk factors such as age, smoking habit, and  
34 use of oral contraceptives.[8] However, no association was observed between migraine and  
35 cardiovascular conditions such as hypertension, probably due to the younger age of migraine  
36 patients in this study or small numbers of high-risk migraine patients for cardiovascular  
37 conditions.  
38  
39  
40  
41  
42  
43  
44  
45  
46  
47  
48

### 49 *Other comorbidities*

50 As found in our study, anemia,[29] and thyroid dysfunction[30] have been described as  
51 comorbidities of migraine. Similarly, restless leg syndrome[19] has been shown for the  
52 association, although the association may be controversial.[31]  
53  
54  
55  
56  
57  
58  
59  
60

1  
2  
3 The observation on the relationship between migraine and fibromyalgia in this study is  
4 consistent with previous studies.[32] Fibromyalgia may share a pathological pathway with  
5 migraine through chronic hypothalamic neuroendocrine dysfunction, resulting in abnormal  
6 central nervous system sensory processing.[33]  
7  
8  
9  
10  
11  
12  
13  
14  
15

### 16 **Clinical Implications**

17  
18 Although some of the associations are not solidly established with potential pathological  
19 explanation, the findings from this study appear to have clinical importance. Various  
20 comorbidities are at high prevalence among migraine patients. Migraine patients may  
21 experience impairment for daily life and loss of productivity not only because of the migraine  
22 but also its comorbidities. In the treatment of migraine, comorbidities may influence  
23 therapeutic choices in two ways. First, by taking comorbidities into consideration, medication  
24 can be selected both for migraine and comorbidities. Second, therapeutic options for migraine  
25 may be limited if there are comorbidities as contraindications to migraine medications.[34]  
26  
27 Therefore, accounting for comorbidities in clinical practice is warranted when therapeutic  
28 options are considered.[34,35] Additionally, comorbidities may provide insights to the  
29 physiopathology of migraine which could facilitate effective management and treatment of  
30 migraine.  
31  
32  
33  
34  
35  
36  
37  
38  
39  
40  
41  
42  
43  
44  
45  
46  
47  
48  
49

### 50 **Limitations**

51  
52 There are a few limitations to be mentioned for this study. NHWS is cross-sectional and causal  
53 relationship between migraine and comorbidities cannot be concluded, i.e., if the comorbidities  
54 were induced by migraine or treatment for migraine or vice versa. In addition, respondents self-  
55 reported their migraine symptoms as well as comorbidities, which may lead to potential recall  
56  
57  
58  
59  
60

1  
2  
3 bias. Although ICHD-3 like criteria were created for this study using available self-reported  
4 data, discrepancies between the criteria used in this study and the formal ICHD-3 criteria still  
5 exist. Lastly, NHWS is an online survey and thus respondents without internet access were not  
6 included in the study.  
7  
8  
9  
10  
11  
12  
13  
14  
15  
16  
17  
18

## 19 **CONCLUSION**

20  
21  
22 Our study found that migraine patients are more likely to have psychiatric and somatic  
23 comorbidities compared with matched non-migraine respondents, some of which are novel  
24 ones previously unreported in Japan. This study showed that migraine patients in Japan face an  
25 additional comorbid burden and provides insights on comorbidities of migraine they may  
26 suffer. It is hoped that identifying and treating migraine along with their comorbidities, which  
27 usually complicate care, will help in good clinical practice and improve outcomes among  
28 migraine patients.  
29  
30  
31  
32  
33  
34  
35  
36  
37  
38  
39  
40  
41  
42  
43  
44

## 45 **Ethics approval and consent to participate**

46  
47 The 2017 Japan NHWS survey was approved with exemption status upon review by Pearl  
48 Institutional Review Board (Indianapolis, IN, IRB Study Number: 17-KANT-150). All NHWS  
49 respondents provided informed online consent prior to participating. Study participants or the  
50 public were not involved in the design, or conduct, or reporting, or dissemination plans of our  
51 research.  
52  
53  
54  
55  
56  
57  
58

59 Patient consent form: Not required  
60

## Consent for publication

Not applicable.

## Funding

This work was supported by Amgen K.K. grant number [funding/grant number: not available].

## Competing interests

SK and TT received consultation fee for this study. YC is an employee at Cerner Enviza, Singapore. Cerner Enviza received funding from Amgen K.K. for conduction of the analysis and manuscript development. MH and KI are employees at Amgen K.K., and KA is a former employee at Amgen K.K. and is currently an employee of IQVIA Solutions Japan, K.K. MH holds, and KA held stocks of Amgen Inc.

## Author contributions

SK, YC, KI, MH, KA, and TT conceptualized and designed the study. YC analyzed the data. SK, YC, KI, MH, KA, and TT interpreted the results and contributed to the original draft of the manuscript. All authors read and approve the final manuscript.

## Acknowledgements

The authors would like to thank Amanda Woo from Cerner Enviza for support with development, writing and editing of the manuscript.

### Data sharing statement

Study data to support our findings are available from Cerner Enviza, but availability of the data is restricted and was used under license for this study and are not publicly available. Data are, however, available from the authors upon reasonable request and with the permission of Cerner Enviza.

I, the Submitting Author has the right to grant and does grant on behalf of all authors of the Work (as defined in the below author licence), an exclusive licence and/or a non-exclusive licence for contributions from authors who are: i) UK Crown employees; ii) where BMJ has agreed a CC-BY licence shall apply, and/or iii) in accordance with the terms applicable for US Federal Government officers or employees acting as part of their official duties; on a worldwide, perpetual, irrevocable, royalty-free basis to BMJ Publishing Group Ltd (“BMJ”) its licensees and where the relevant Journal is co-owned by BMJ to the co-owners of the Journal, to publish the Work in BMJ Global Health and any other BMJ products and to exploit all rights, as set out in our licence.

The Submitting Author accepts and understands that any supply made under these terms is made by BMJ to the Submitting Author unless you are acting as an employee on behalf of your employer or a postgraduate student of an affiliated institution which is paying any applicable article publishing charge (“APC”) for Open Access articles. Where the Submitting Author wishes to make the Work available on an Open Access basis (and intends to pay the relevant APC), the terms of reuse of such Open Access shall be governed by a Creative Commons

1  
2  
3 licence – details of these licences and which Creative Commons licence will apply to this Work  
4  
5 are set out in our licence referred to above.  
6  
7  
8  
9  
10  
11  
12  
13  
14

## 15 REFERENCES

- 17 1 Steiner TJ, Stovner LJ, Jensen R, *et al.* Migraine remains second among the world's causes  
18 of disability, and first among young women: findings from GBD2019. *J Headache Pain*  
19 2020;**21**:137. doi:10.1186/s10194-020-01208-0
- 21 2 Takeshima T, Ishizaki K, Fukuhara Y, *et al.* Population-Based Door-to-Door Survey of  
22 Migraine in Japan: The Daisen Study. *Headache J Head Face Pain* 2004;**44**:8–19.  
23 doi:10.1111/j.1526-4610.2004.04004.x
- 24 3 Suzuki N, Ishikawa Y, Gomi S, *et al.* Prevalence and characteristics of headaches in a  
25 socially active population working in the Tokyo metropolitan area -surveillance by an  
26 industrial health consortium. *Intern Med Tokyo Jpn* 2014;**53**:683–9.  
27 doi:10.2169/internalmedicine.53.1700
- 28 4 Lipton RB, Fanning KM, Buse DC, *et al.* Identifying Natural Subgroups of Migraine Based  
29 on Comorbidity and Concomitant Condition Profiles: Results of the Chronic Migraine  
30 Epidemiology and Outcomes (CaMEO) Study. *Headache* 2018;**58**:933–47.  
31 doi:10.1111/head.13342
- 32 5 Breslau N, Davis GC. Migraine, physical health and psychiatric disorder: a prospective  
33 epidemiologic study in young adults. *J Psychiatr Res* 1993;**27**:211–21. doi:10.1016/0022-  
34 3956(93)90009-q
- 35 6 Jeyagurunathan A, Abdin E, Vaingankar JA, *et al.* Prevalence and comorbidity of migraine  
36 headache: results from the Singapore Mental Health Study 2016. *Soc Psychiatry Psychiatr*  
37 *Epidemiol* 2020;**55**:33–43. doi:10.1007/s00127-019-01755-1
- 38 7 Minen MT, Begasse De Dhaem O, Kroon Van Diest A, *et al.* Migraine and its psychiatric  
39 comorbidities. *J Neurol Neurosurg Psychiatry* 2016;**87**:741–9. doi:10.1136/jnnp-2015-  
40 312233
- 41 8 Al-Hassany L, Linstra KA, Terwindt GM, *et al.* Cardiovascular Risk of Migraine in Men  
42 and Women. In: Maassen van den Brink A, MacGregor EA, eds. *Gender and Migraine*.  
43 Cham: : Springer International Publishing 2019. 17–29. doi:10.1007/978-3-030-02988-3\_2
- 44 9 Adelborg K, Szépligeti SK, Holland-Bill L, *et al.* Migraine and risk of cardiovascular  
45 diseases: Danish population based matched cohort study. *BMJ* 2018;**360**:k96.  
46 doi:10.1136/bmj.k96

- 10 Buse DC, Reed ML, Fanning KM, *et al.* Comorbid and co-occurring conditions in migraine and associated risk of increasing headache pain intensity and headache frequency: results of the migraine in America symptoms and treatment (MAST) study. *J Headache Pain* 2020;**21**:23. doi:10.1186/s10194-020-1084-y
- 11 Lau C-I, Lin C-C, Chen W-H, *et al.* Association between migraine and irritable bowel syndrome: a population-based retrospective cohort study. *Eur J Neurol* 2014;**21**:1198–204. doi:10.1111/ene.12468
- 12 Cámara-Lemarroy CR, Rodríguez-Gutiérrez R, Monreal-Robles R, *et al.* Gastrointestinal disorders associated with migraine: A comprehensive review. *World J Gastroenterol* 2016;**22**:8149–60. doi:10.3748/wjg.v22.i36.8149
- 13 Aamodt AH, Stovner LJ, Hagen K, *et al.* Comorbidity of headache and gastrointestinal complaints. The Head-HUNT Study. *Cephalalgia Int J Headache* 2008;**28**:144–51. doi:10.1111/j.1468-2982.2007.01486.x
- 14 Wang L, Deng Z-R, Zu M-D, *et al.* The Comorbid Relationship Between Migraine and Asthma: A Systematic Review and Meta-Analysis of Population-Based Studies. *Front Med* 2021;**7**:609528. doi:10.3389/fmed.2020.609528
- 15 Aamodt AH, Stovner LJ, Langhammer A, *et al.* Is headache related to asthma, hay fever, and chronic bronchitis? The Head-HUNT Study. *Headache* 2007;**47**:204–12. doi:10.1111/j.1526-4610.2006.00597.x
- 16 Uhlig BL, Engstrøm M, Ødegård SS, *et al.* Headache and insomnia in population-based epidemiological studies. *Cephalalgia Int J Headache* 2014;**34**:745–51. doi:10.1177/0333102414540058
- 17 Song T-J, Cho S-J, Kim W-J, *et al.* Poor sleep quality in migraine and probable migraine: a population study. *J Headache Pain* 2018;**19**:58. doi:10.1186/s10194-018-0887-6
- 18 Tietjen GE, Conway A, Utley C, *et al.* Migraine is associated with menorrhagia and endometriosis. *Headache* 2006;**46**:422–8. doi:10.1111/j.1526-4610.2006.00290.x
- 19 Suzuki S, Suzuki K, Miyamoto M, *et al.* Evaluation of contributing factors to restless legs syndrome in migraine patients. *J Neurol* 2011;**258**:2026–35. doi:10.1007/s00415-011-6064-3
- 20 Yamada K, Moriwaki K, Oiso H, *et al.* High prevalence of comorbidity of migraine in outpatients with panic disorder and effectiveness of psychopharmacotherapy for both disorders: a retrospective open label study. *Psychiatry Res* 2011;**185**:145–8. doi:10.1016/j.psychres.2009.08.004
- 21 Kikui S, Chen Y, Todaka H, *et al.* Burden of migraine among Japanese patients: a cross-sectional National Health and Wellness Survey. *J Headache Pain* 2020;**21**:110. doi:10.1186/s10194-020-01180-9
- 22 Quan H, Li B, Couris CM, *et al.* Updating and Validating the Charlson Comorbidity Index and Score for Risk Adjustment in Hospital Discharge Abstracts Using Data From 6 Countries. *Am J Epidemiol* 2011;**173**:676–82. doi:10.1093/aje/kwq433



- 1  
2  
3 23 Fumihiko S, Yasuo F, Makoto I, *et al.* Evaluation of Reliability of the Japanese Version  
4 “Headache Impact Test (HIT-6)” | Article Information | J-GLOBAL. 臨床医薬  
5 2004;**20**:1045–54.  
6  
7  
8 24 Baskin SM, Smitherman TA. Migraine and psychiatric disorders: comorbidities,  
9 mechanisms, and clinical applications. *Neurol Sci* 2009;**30**:61–5. doi:10.1007/s10072-009-  
10 0071-5  
11  
12 25 Brainstorm Consortium, Anttila V, Bulik-Sullivan B, *et al.* Analysis of shared heritability  
13 in common disorders of the brain. *Science* 2018;**360**. doi:10.1126/science.aap8757  
14  
15 26 Su J, Zhou X-Y, Zhang G-X. Association between *Helicobacter pylori* infection and  
16 migraine: a meta-analysis. *World J Gastroenterol* 2014;**20**:14965–72.  
17 doi:10.3748/wjg.v20.i40.14965  
18  
19  
20 27 Hofmeister S, Bodden S. Premenstrual Syndrome and Premenstrual Dysphoric Disorder.  
21 *Am Fam Physician* 2016;**94**:236–40.  
22  
23 28 Cupini LM, Corbelli I, Sarchelli P. Menstrual migraine: what it is and does it matter? *J*  
24 *Neurol* 2021;**268**:2355–63. doi:10.1007/s00415-020-09726-2  
25  
26 29 Tayyebi A, Poursadeghfard M, Nazeri M, *et al.* Is There Any Correlation between Migraine  
27 Attacks and Iron Deficiency Anemia? A Case-Control Study. *Int J Hematol-Oncol Stem*  
28 *Cell Res* 2019;**13**:164.  
29  
30  
31 30 Spanou I, Bougea A, Liakakis G, *et al.* Relationship of Migraine and Tension-Type  
32 Headache With Hypothyroidism: A Literature Review. *Headache* 2019;**59**:1174–86.  
33 doi:10.1111/head.13600  
34  
35 31 Trenkwalder C, Allen R, Högl B, *et al.* Restless legs syndrome associated with major  
36 diseases: A systematic review and new concept. *Neurology* 2016;**86**:1336–43.  
37 doi:10.1212/WNL.0000000000002542  
38  
39  
40 32 Penn I-W, Chuang E, Chuang T-Y, *et al.* Bidirectional association between migraine and  
41 fibromyalgia: retrospective cohort analyses of two populations. *BMJ Open*  
42 2019;**9**:e026581. doi:10.1136/bmjopen-2018-026581  
43  
44 33 Valença MM, Medeiros FL, Martins HA, *et al.* Neuroendocrine dysfunction in  
45 fibromyalgia and migraine. *Curr Pain Headache Rep* 2009;**13**:358–64.  
46 doi:10.1007/s11916-009-0058-1  
47  
48 34 Lipton RB, Silberstein SD. Why study the comorbidity of migraine? *Neurology*  
49 1994;**44**:S4-5.  
50  
51  
52 35 Araki N, Takeshima T, Ando N, *et al.* Clinical practice guideline for chronic headache  
53 2013. Published Online First:  
54 2019. <https://onlinelibrary.wiley.com/doi/abs/10.1111/ncn3.12322> (accessed 17 Jul 2020).  
55  
56  
57  
58  
59  
60

1  
2  
3 **Figure legends**  
4

5 **Figure 1. Respondent flow chart**  
6  
7

8 **Figure 2. Propensity score-matched prevalence odds ratio for psychiatric comorbidities**  
9  
10

11 **Figure 3. Propensity score-matched prevalence odds ratio for somatic comorbidities**  
12  
13  
14  
15  
16  
17  
18  
19  
20  
21  
22  
23  
24  
25  
26  
27  
28  
29  
30  
31  
32  
33  
34  
35  
36  
37  
38  
39  
40  
41  
42  
43  
44  
45  
46  
47  
48  
49  
50  
51  
52  
53  
54  
55  
56  
57  
58  
59  
60

For peer review only

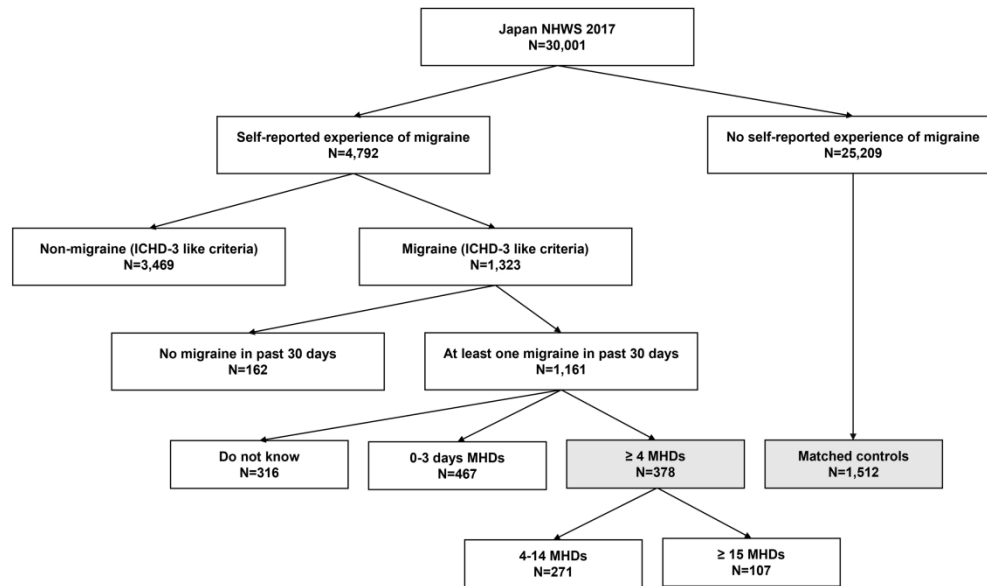

ICHD-3, International Classification of Headache Disorder, 3<sup>rd</sup> Edition; MHDs, Monthly Headache Days.

Note: Shaded squares indicate the study populations – migraine patients (≥ 4 MHDs; N=378) and matched non-migraine respondents (Matched controls; N=1,512).

Figure 1. Respondent flow chart

130x86mm (600 x 600 DPI)

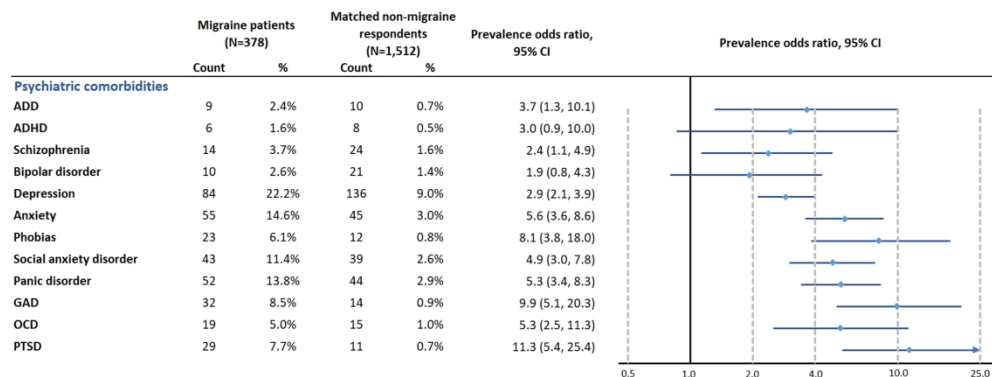

ADD, attention-deficit disorder; ADHD, attention-deficit/hyperactivity disorder; GAD, generalized anxiety disorder; OCD, obsessive-compulsive disorder; PTSD, posttraumatic stress disorder.  
 Note: Comorbidities with prevalence between 5% to 10% among migraine patients: phobias, GAD, OCD, and PTSD. Comorbidities with more than 10% prevalence among migraine patients: depression, anxiety, social anxiety disorder, and panic disorder.

Figure 2. Propensity score-matched prevalence odds ratio for psychiatric comorbidities

139x67mm (600 x 600 DPI)

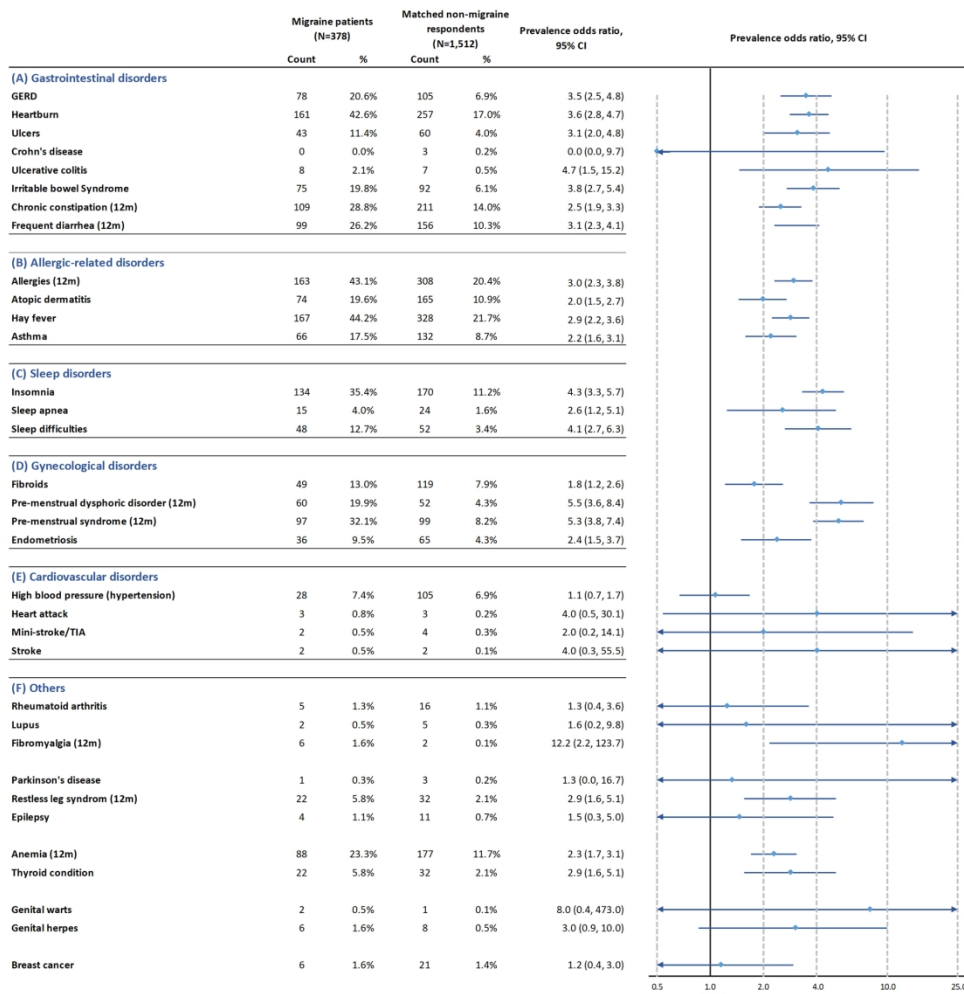

GERD, gastroesophageal reflux disease; TIA, transient ischemia attack.  
 Note: Comorbidities with prevalence between 5% to 10% among migraine patients: endometriosis, high blood pressure, restless leg syndrome, and thyroid condition. Comorbidities with more than 10% prevalence among migraine patients: irritable bowel syndrome, heartburn, GERD, ulcers, frequent diarrhea, chronic constipation, allergies, hay fever, asthma, atopic dermatitis, insomnia, sleep difficulties, pre-menstrual dysphoric disorder, pre-menstrual syndrome, fibroids, and anemia.

Figure 3. Propensity score-matched prevalence odds ratio for somatic comorbidities

86x94mm (600 x 600 DPI)

**Supplementary Table 1. Propensity score-matched prevalence odds ratio for psychiatric comorbidities among patients with migraine with <15 monthly headache days vs. ≥15 monthly headache days**

|                                | Migraine patients<br>MHDs<15<br>(N=271) |       | Matched non-migraine<br>respondents<br>(N=1,084) |      | Prevalence odds<br>ratio, 95% CI<br>MHDs<15 | Prevalence odds<br>ratio, 95% CI<br>MHDs≥15 | Migraine patients<br>MHDs≥15<br>(N=107) |       | Matched non-migraine<br>respondents<br>(N=428) |      |
|--------------------------------|-----------------------------------------|-------|--------------------------------------------------|------|---------------------------------------------|---------------------------------------------|-----------------------------------------|-------|------------------------------------------------|------|
|                                | Count                                   | %     | Count                                            | %    |                                             |                                             | Count                                   | %     | Count                                          | %    |
| <b>ADD</b>                     | 9                                       | 2.4%  | 10                                               | 0.7% | 3.7 (1.3, 10.1)                             | 6.1 (0.7, 73.9)                             | 3                                       | 2.8%  | 2                                              | 0.5% |
| <b>ADHD</b>                    | 6                                       | 1.6%  | 8                                                | 0.5% | 3.0 (0.9, 10.0)                             | 12.3 (1.0, 645.5)                           | 3                                       | 2.8%  | 1                                              | 0.2% |
| <b>Schizophrenia</b>           | 14                                      | 3.7%  | 24                                               | 1.6% | 2.4 (1.1, 4.9)                              | 5.0 (1.3, 21.2)                             | 6                                       | 5.6%  | 5                                              | 1.2% |
| <b>Bipolar disorder</b>        | 10                                      | 2.6%  | 21                                               | 1.4% | 1.9 (0.8, 4.3)                              | 3.0 (0.7, 11.0)                             | 5                                       | 4.7%  | 7                                              | 1.6% |
| <b>Depression</b>              | 84                                      | 22.2% | 136                                              | 9.0% | 2.9 (2.1, 3.9)                              | 6.5 (3.6, 11.6)                             | 36                                      | 33.6% | 31                                             | 7.2% |
| <b>Anxiety</b>                 | 55                                      | 14.6% | 45                                               | 3.0% | 5.6 (3.6, 8.6)                              | 9.5 (4.5, 20.5)                             | 26                                      | 24.3% | 14                                             | 3.3% |
| <b>Phobias</b>                 | 23                                      | 6.1%  | 12                                               | 0.8% | 8.1 (3.8, 18.0)                             | 17.2 (3.3, 167.4)                           | 8                                       | 7.5%  | 2                                              | 0.5% |
| <b>Social anxiety disorder</b> | 43                                      | 11.4% | 39                                               | 2.6% | 4.9 (3.0, 7.8)                              | 6.7 (2.8, 16.4)                             | 16                                      | 15.0% | 11                                             | 2.6% |
| <b>Panic disorder</b>          | 52                                      | 13.8% | 44                                               | 2.9% | 5.3 (3.4, 8.3)                              | 12.1 (5.3, 29.2)                            | 24                                      | 22.4% | 10                                             | 2.3% |
| <b>GAD</b>                     | 32                                      | 8.5%  | 14                                               | 0.9% | 9.9 (5.1, 20.3)                             | 18.6 (5.8, 77.8)                            | 16                                      | 15.0% | 4                                              | 0.9% |
| <b>OCD</b>                     | 19                                      | 5.0%  | 15                                               | 1.0% | 5.3 (2.5, 11.3)                             | 11.5 (2.7, 67.6)                            | 8                                       | 7.5%  | 3                                              | 0.7% |
| <b>PTSD</b>                    | 29                                      | 7.7%  | 11                                               | 0.7% | 11.3 (5.4, 25.4)                            | 22.0 (4.5, 207.0)                           | 10                                      | 9.3%  | 2                                              | 0.5% |

ADD, attention deficit disorder; ADHD, attention deficit hyperactivity disorder; GAD, generalized anxiety disorder; OCD, obsessive compulsive disorder; PTSD, post-traumatic stress disorder.

**Supplementary Table 2. Propensity score-matched prevalence odds ratio for somatic comorbidities among patients with migraine with <15 monthly headache days vs. ≥15 monthly headache days**

|                                   | Migraine patients<br>MHDs<15<br>(N=271) |       | Matched non-<br>migraine respondents<br>(N=1,084) |       | Prevalence odds<br>ratio, 95% CI<br>MHDs<15 | Prevalence odds<br>ratio, 95% CI<br>MHDs≥15 | Migraine patients<br>MHDs≥15<br>(N=107) |       | Matched non-migraine<br>respondents<br>(N=428) |       |
|-----------------------------------|-----------------------------------------|-------|---------------------------------------------------|-------|---------------------------------------------|---------------------------------------------|-----------------------------------------|-------|------------------------------------------------|-------|
|                                   | Count                                   | %     | Count                                             | %     |                                             |                                             | Count                                   | %     | Count                                          | %     |
| <b>Gastrointestinal disorders</b> |                                         |       |                                                   |       |                                             |                                             |                                         |       |                                                |       |
| <b>GERD</b>                       | 43                                      | 15.9% | 74                                                | 6.8%  | 2.6 (1.7, 3.9)                              | 6.2 (3.5, 11.1)                             | 35                                      | 32.7% | 31                                             | 7.2%  |
| <b>Heartburn</b>                  | 104                                     | 38.4% | 180                                               | 16.6% | 3.1 (2.3, 4.2)                              | 5.1 (3.2, 8.2)                              | 57                                      | 53.3% | 78                                             | 18.2% |
| <b>Ulcers</b>                     | 28                                      | 10.3% | 45                                                | 4.2%  | 2.7 (1.6, 4.5)                              | 4.5 (2.0, 10.2)                             | 15                                      | 14.0% | 15                                             | 3.5%  |
| <b>Crohn's disease</b>            | 0                                       | 0.0%  | 2                                                 | 0.2%  | 0.0 (0.0, 21.3)                             | 0.0 (0.0, 155.6)                            | 0                                       | 0.0%  | 1                                              | 0.2%  |
| <b>Ulcerative colitis</b>         | 4                                       | 1.5%  | 6                                                 | 0.6%  | 2.7 (0.6, 11.4)                             | 16.6 (1.6, 814.6)                           | 4                                       | 3.7%  | 1                                              | 0.2%  |
| <b>Irritable bowel Syndrome</b>   | 45                                      | 16.6% | 71                                                | 6.5%  | 2.8 (1.9, 4.3)                              | 7.6 (3.9, 14.6)                             | 30                                      | 28.0% | 21                                             | 4.9%  |
| <b>Chronic constipation (12m)</b> | 74                                      | 27.3% | 141                                               | 13.0% | 2.5 (1.8, 3.5)                              | 2.5 (1.5, 4.2)                              | 35                                      | 32.7% | 69                                             | 16.1% |
| <b>Frequent diarrhea (12m)</b>    | 64                                      | 23.6% | 118                                               | 10.9% | 2.53 (1.8, 3.6)                             | 4.9 (2.8, 8.4)                              | 35                                      | 32.7% | 39                                             | 9.1%  |
| <b>Allergic-related disorders</b> |                                         |       |                                                   |       |                                             |                                             |                                         |       |                                                |       |
| <b>Allergies (12m)</b>            | 115                                     | 42.4% | 202                                               | 18.6% | 3.2 (2.4, 4.3)                              | 2.4 (1.5, 3.9)                              | 48                                      | 44.9% | 107                                            | 25.0% |
| <b>Atopic dermatitis</b>          | 53                                      | 19.6% | 121                                               | 11.2% | 1.9 (1.3, 2.8)                              | 2.2 (1.2, 4.0)                              | 21                                      | 19.6% | 43                                             | 10.0% |
| <b>Hay fever</b>                  | 117                                     | 43.2% | 217                                               | 20.0% | 3.0 (2.3, 4.1)                              | 2.5 (1.6, 3.9)                              | 50                                      | 46.7% | 112                                            | 26.2% |
| <b>Asthma</b>                     | 42                                      | 15.5% | 88                                                | 8.1%  | 2.1 (1.4, 3.1)                              | 2.5 (1.4, 4.5)                              | 24                                      | 22.4% | 44                                             | 10.3% |
| <b>Sleep disorders</b>            |                                         |       |                                                   |       |                                             |                                             |                                         |       |                                                |       |
| <b>Insomnia</b>                   | 83                                      | 30.6% | 119                                               | 11.0% | 3.6 (2.6, 5.0)                              | 6.7 (4.0, 11.2)                             | 51                                      | 47.7% | 51                                             | 11.9% |
| <b>Sleep apnea</b>                | 13                                      | 4.8%  | 21                                                | 1.9%  | 2.6 (1.2, 5.4)                              | 2.7 (0.2, 23.8)                             | 2                                       | 1.9%  | 3                                              | 0.7%  |
| <b>Sleep difficulties</b>         | 31                                      | 11.4% | 37                                                | 3.4%  | 3.7 (2.1, 6.2)                              | 5.2 (2.3, 11.6)                             | 17                                      | 15.9% | 15                                             | 3.5%  |
| <b>Gynecological disorders</b>    |                                         |       |                                                   |       |                                             |                                             |                                         |       |                                                |       |

|                                               |    |       |     |       |                  |                  |    |       |    |       |
|-----------------------------------------------|----|-------|-----|-------|------------------|------------------|----|-------|----|-------|
| <b>Fibroids</b>                               | 34 | 12.5% | 91  | 8.4%  | 1.6 (1.0, 2.4)   | 1.8 (1.2, 2.6)   | 15 | 14.0% | 28 | 6.5%  |
| <b>Pre-menstrual dysphoric disorder (12m)</b> | 38 | 14.0% | 40  | 3.7%  | 4.4 (2.6, 7.2)   | 5.5 (3.6, 8.4)   | 22 | 20.6% | 12 | 2.8%  |
| <b>Pre-menstrual syndrome (12m)</b>           | 64 | 23.6% | 64  | 5.9%  | 5.2 (3.5, 7.8)   | 5.3 (3.8, 7.4)   | 33 | 30.8% | 34 | 7.9%  |
| <b>Endometriosis</b>                          | 22 | 8.1%  | 47  | 4.3%  | 2.0 (1.1, 3.4)   | 2.4 (1.5, 3.7)   | 14 | 13.1% | 18 | 4.2%  |
| <b>Cardiovascular disorders</b>               |    |       |     |       |                  |                  |    |       |    |       |
| <b>High blood pressure (hypertension)</b>     | 24 | 8.9%  | 76  | 7.0%  | 1.3 (0.8, 2.1)   | 0.5 (0.1, 1.6)   | 4  | 3.7%  | 29 | 6.8%  |
| <b>Heart attack</b>                           | 3  | 1.1%  | 3   | 0.3%  | 4.0 (0.5, 30.3)  | NA               | 0  | 0.0%  | 0  | 0.0%  |
| <b>Mini-stroke/TIA</b>                        | 1  | 0.4%  | 4   | 0.4%  | 1.0 (0.02, 10.2) | Inf (0.1, Inf)   | 1  | 0.9%  | 0  | 0.0%  |
| <b>Stroke</b>                                 | 2  | 0.7%  | 2   | 0.2%  | 4.0 (0.3, 55.6)  | NA               | 0  | 0.0%  | 0  | 0.0%  |
| <b>Others</b>                                 |    |       |     |       |                  |                  |    |       |    |       |
| <b>Rheumatoid arthritis</b>                   | 4  | 1.5%  | 13  | 1.2%  | 1.2 (0.3, 4.0)   | 1.3 (0.03, 16.8) | 1  | 0.9%  | 3  | 0.7%  |
| <b>Lupus</b>                                  | 2  | 0.7%  | 2   | 0.2%  | 4.0 (0.3, 10.2)  | 0.0 (0.0, 9.7)   | 0  | 0.0%  | 3  | 0.7%  |
| <b>Fibromyalgia (12m)</b>                     | 3  | 1.1%  | 2   | 0.2%  | 6.1 (0.7, 72.6)  | Inf (1.7, Inf)   | 3  | 2.8%  | 0  | 0.0%  |
| <b>Parkinson's disease</b>                    | 1  | 0.4%  | 3   | 0.3%  | 1.3 (0.03, 16.7) | NA               | 0  | 0.0%  | 0  | 0.0%  |
| <b>Restless leg syndrome (12m)</b>            | 14 | 5.2%  | 25  | 2.3%  | 2.3 (1.1, 4.7)   | 4.9 (1.5, 16.1)  | 8  | 7.5%  | 7  | 1.6%  |
| <b>Epilepsy</b>                               | 2  | 0.7%  | 6   | 0.6%  | 1.3 (0.1, 7.5)   | 1.6 (0.2, 10.0)  | 2  | 1.9%  | 5  | 1.2%  |
| <b>Anemia (12m)</b>                           | 58 | 21.4% | 121 | 11.2% | 2.2 (1.5, 3.1)   | 2.6 (1.5, 4.4)   | 30 | 28.0% | 56 | 13.1% |
| <b>Thyroid condition</b>                      | 14 | 5.2%  | 23  | 2.1%  | 2.5 (1.2, 5.2)   | 3.8 (1.2, 11.3)  | 8  | 7.5%  | 9  | 2.1%  |
| <b>Genital warts</b>                          | 2  | 0.7%  | 1   | 0.1%  | 8.1 (0.4, 474.0) | NA               | 0  | 0.0%  | 0  | 0.0%  |
| <b>Genital herpes</b>                         | 5  | 1.8%  | 6   | 0.6%  | 3.4 (0.8, 13.4)  | 2.0 (0.03, 38.8) | 1  | 0.9%  | 2  | 0.5%  |
| <b>Breast cancer</b>                          | 3  | 1.1%  | 18  | 1.7%  | 0.7 (0.1, 2.3)   | 6.1 (0.7, 73.9)  | 3  | 2.8%  | 2  | 0.5%  |



**STROBE 2007 (v4) Statement—Checklist of items that should be included in reports of *cross-sectional studies***

| Section/Topic                | Item # | Recommendation                                                                                                                                                                       | Reported on page # |
|------------------------------|--------|--------------------------------------------------------------------------------------------------------------------------------------------------------------------------------------|--------------------|
| <b>Title and abstract</b>    | 1      | (a) Indicate the study's design with a commonly used term in the title or the abstract                                                                                               | 1 & 2              |
|                              |        | (b) Provide in the abstract an informative and balanced summary of what was done and what was found                                                                                  | 2-3                |
| <b>Introduction</b>          |        |                                                                                                                                                                                      |                    |
| Background/rationale         | 2      | Explain the scientific background and rationale for the investigation being reported                                                                                                 | 4                  |
| Objectives                   | 3      | State specific objectives, including any prespecified hypotheses                                                                                                                     | 4                  |
| <b>Methods</b>               |        |                                                                                                                                                                                      | 5-7                |
| Study design                 | 4      | Present key elements of study design early in the paper                                                                                                                              | 5                  |
| Setting                      | 5      | Describe the setting, locations, and relevant dates, including periods of recruitment, exposure, follow-up, and data collection                                                      | 5                  |
| Participants                 | 6      | (a) Give the eligibility criteria, and the sources and methods of selection of participants                                                                                          | 5                  |
| Variables                    | 7      | Clearly define all outcomes, exposures, predictors, potential confounders, and effect modifiers. Give diagnostic criteria, if applicable                                             | 6                  |
| Data sources/<br>measurement | 8*     | For each variable of interest, give sources of data and details of methods of assessment (measurement). Describe comparability of assessment methods if there is more than one group | 6                  |
| Bias                         | 9      | Describe any efforts to address potential sources of bias                                                                                                                            | NA                 |
| Study size                   | 10     | Explain how the study size was arrived at                                                                                                                                            | NA                 |
| Quantitative variables       | 11     | Explain how quantitative variables were handled in the analyses. If applicable, describe which groupings were chosen and why                                                         | 7                  |
| Statistical methods          | 12     | (a) Describe all statistical methods, including those used to control for confounding                                                                                                | 7                  |
|                              |        | (b) Describe any methods used to examine subgroups and interactions                                                                                                                  | 7                  |
|                              |        | (c) Explain how missing data were addressed                                                                                                                                          | NA                 |
|                              |        | (d) If applicable, describe analytical methods taking account of sampling strategy                                                                                                   | 7                  |
|                              |        | (e) Describe any sensitivity analyses                                                                                                                                                | NA                 |
| <b>Results</b>               |        |                                                                                                                                                                                      |                    |

|                          |     |                                                                                                                                                                                                              |               |
|--------------------------|-----|--------------------------------------------------------------------------------------------------------------------------------------------------------------------------------------------------------------|---------------|
| Participants             | 13* | (a) Report numbers of individuals at each stage of study—eg numbers potentially eligible, examined for eligibility, confirmed eligible, included in the study, completing follow-up, and analysed            | 8             |
|                          |     | (b) Give reasons for non-participation at each stage                                                                                                                                                         | NA            |
|                          |     | (c) Consider use of a flow diagram                                                                                                                                                                           | 8 (Figure 1)  |
| Descriptive data         | 14* | (a) Give characteristics of study participants (eg demographic, clinical, social) and information on exposures and potential confounders                                                                     | 8-9 (Table 1) |
|                          |     | (b) Indicate number of participants with missing data for each variable of interest                                                                                                                          | NA            |
| Outcome data             | 15* | Report numbers of outcome events or summary measures                                                                                                                                                         | 8-12          |
| Main results             | 16  | (a) Give unadjusted estimates and, if applicable, confounder-adjusted estimates and their precision (eg, 95% confidence interval). Make clear which confounders were adjusted for and why they were included | 8-12          |
|                          |     | (b) Report category boundaries when continuous variables were categorized                                                                                                                                    | 8-12          |
|                          |     | (c) If relevant, consider translating estimates of relative risk into absolute risk for a meaningful time period                                                                                             | NA            |
| Other analyses           | 17  | Report other analyses done—eg analyses of subgroups and interactions, and sensitivity analyses                                                                                                               | 12            |
| <b>Discussion</b>        |     |                                                                                                                                                                                                              | 13-17         |
| Key results              | 18  | Summarise key results with reference to study objectives                                                                                                                                                     | 13            |
| Limitations              | 19  | Discuss limitations of the study, taking into account sources of potential bias or imprecision. Discuss both direction and magnitude of any potential bias                                                   | 16-17         |
| Interpretation           | 20  | Give a cautious overall interpretation of results considering objectives, limitations, multiplicity of analyses, results from similar studies, and other relevant evidence                                   | 16-17         |
| Generalisability         | 21  | Discuss the generalisability (external validity) of the study results                                                                                                                                        | 16-17         |
| <b>Other information</b> |     |                                                                                                                                                                                                              |               |
| Funding                  | 22  | Give the source of funding and the role of the funders for the present study and, if applicable, for the original study on which the present article is based                                                | 18            |
|                          |     |                                                                                                                                                                                                              |               |

\*Give information separately for cases and controls in case-control studies and, if applicable, for exposed and unexposed groups in cohort and cross-sectional studies.

**Note:** An Explanation and Elaboration article discusses each checklist item and gives methodological background and published examples of transparent reporting. The STROBE checklist is best used in conjunction with this article (freely available on the Web sites of PLoS Medicine at <http://www.plosmedicine.org/>, Annals of Internal Medicine at <http://www.annals.org/>, and Epidemiology at <http://www.epidem.com/>). Information on the STROBE Initiative is available at [www.strobe-statement.org](http://www.strobe-statement.org).

# BMJ Open

## Comorbidities in Patients with Migraine in Japan: A Cross-sectional Study Using Data from National Health and Wellness Survey

|                                 |                                                                                                                                                                                                                                                                              |
|---------------------------------|------------------------------------------------------------------------------------------------------------------------------------------------------------------------------------------------------------------------------------------------------------------------------|
| Journal:                        | <i>BMJ Open</i>                                                                                                                                                                                                                                                              |
| Manuscript ID                   | bmjopen-2022-065787.R1                                                                                                                                                                                                                                                       |
| Article Type:                   | Original research                                                                                                                                                                                                                                                            |
| Date Submitted by the Author:   | 26-Oct-2022                                                                                                                                                                                                                                                                  |
| Complete List of Authors:       | Kikui, Shoji; Tominaga Hospital, Department of Neurology & Headache Center<br>Chen, Yirong; Cerner Enviza<br>Ikeda, Ken; Amgen K.K.<br>Hasebe, Miki; Amgen K.K.<br>Asao, Keiko; Amgen K.K.<br>Takeshima, Takao; Tominaga Hospital, Department of Neurology & Headache Center |
| <b>Primary Subject Heading</b>: | Public health                                                                                                                                                                                                                                                                |
| Secondary Subject Heading:      | General practice / Family practice                                                                                                                                                                                                                                           |
| Keywords:                       | Migraine < NEUROLOGY, PUBLIC HEALTH, Quality in health care < HEALTH SERVICES ADMINISTRATION & MANAGEMENT                                                                                                                                                                    |
|                                 |                                                                                                                                                                                                                                                                              |

SCHOLARONE™  
Manuscripts



I, the Submitting Author has the right to grant and does grant on behalf of all authors of the Work (as defined in the below author licence), an exclusive licence and/or a non-exclusive licence for contributions from authors who are: i) UK Crown employees; ii) where BMJ has agreed a CC-BY licence shall apply, and/or iii) in accordance with the terms applicable for US Federal Government officers or employees acting as part of their official duties; on a worldwide, perpetual, irrevocable, royalty-free basis to BMJ Publishing Group Ltd ("BMJ") its licensees and where the relevant Journal is co-owned by BMJ to the co-owners of the Journal, to publish the Work in this journal and any other BMJ products and to exploit all rights, as set out in our [licence](#).

The Submitting Author accepts and understands that any supply made under these terms is made by BMJ to the Submitting Author unless you are acting as an employee on behalf of your employer or a postgraduate student of an affiliated institution which is paying any applicable article publishing charge ("APC") for Open Access articles. Where the Submitting Author wishes to make the Work available on an Open Access basis (and intends to pay the relevant APC), the terms of reuse of such Open Access shall be governed by a Creative Commons licence – details of these licences and which [Creative Commons](#) licence will apply to this Work are set out in our licence referred to above.

Other than as permitted in any relevant BMJ Author's Self Archiving Policies, I confirm this Work has not been accepted for publication elsewhere, is not being considered for publication elsewhere and does not duplicate material already published. I confirm all authors consent to publication of this Work and authorise the granting of this licence.

1  
2  
3 **Title: Comorbidities in Patients with Migraine in Japan: A Cross-sectional Study Using**  
4  
5 **Data from National Health and Wellness Survey**  
6  
7  
8  
9

10 **Authors:** Shoji Kikui<sup>1</sup>, Yirong Chen<sup>2</sup>, Ken Ikeda<sup>3</sup>, Miki Hasebe<sup>3</sup>, Keiko Asao<sup>3</sup>, Takao  
11  
12 Takeshima<sup>1\*</sup>  
13  
14  
15  
16

17 **\* Corresponding author:**

18  
19 Takao Takeshima

20  
21 Address: Department of Neurology & Headache Center, Tominaga Hospital, 1-4-48

22  
23 Minatomiachi, Naniwa-ku, Osaka 556-0017, Japan

24  
25 Email: [ttakeshi@tominaga.or.jp](mailto:ttakeshi@tominaga.or.jp)  
26  
27  
28  
29  
30

31 **Affiliations:**

- 32  
33 1. Department of Neurology & Headache Center, Tominaga Hospital, 1-4-48  
34  
35 Minatomiachi, Naniwa-ku, Osaka 556-0017, Japan.  
36  
37 2. Cerner Enviza, 83 Clemenceau Avenue, #04-101, UE Square, Singapore 239920,  
38  
39 Singapore.  
40  
41  
42 3. Amgen K.K., Midtown Tower, 9-7-1 Akasaka, Minato-ku, Tokyo 107-6239, Japan.  
43  
44  
45  
46

47 **Word count: 3,246 words**  
48  
49  
50  
51  
52  
53  
54  
55  
56  
57  
58  
59  
60

**ABSTRACT (250 WORDS)**

*Objectives* – This study aims to examine the association between migraine and various psychiatric and somatic comorbidities in Japan.

*Design* – Cross-sectional study using existing data of the 2017 Japan National Health and Wellness Survey (NHWS).

*Setting* – Nationally representative sample of persons (in terms of age and gender) living in the general community aged 18 years or older in Japan.

*Participants* – Out of a sample of 30,001 NHWS respondents, 378 respondents were identified as migraine patients and 25,209 were identified as non-migraine patients. After propensity score (PS)-matching (1:4), 1,512 matched non-migraine respondents were identified.

*Primary and secondary outcome measures* – Prevalence and PS-matched prevalence odds-ratio (POR) were assessed for each psychiatric and somatic comorbidity among migraine patients and matched non-migraine respondents (including migraine patients with less than 15 monthly headache days [MHDs] and migraine patients with more than 15 MHDs).

*Results* – Migraine patients were predominately female and had significantly higher prevalence than matched non-migraine respondents to have psychiatric and somatic comorbidities. Psychiatric comorbidities with >5% prevalence among migraine patients included depression, posttraumatic stress disorder, and anxiety disorders, while gastrointestinal disorders were the most prevalent somatic comorbidity category. Other somatic comorbidities included allergies, insomnia, pre-menstrual syndrome, and anemia. Migraine patients with more than 15 MHDs tended to have higher point estimates for POR.

*Conclusion* – Psychiatric and somatic conditions were more prevalent in migraine patients than matched non-migraine respondents, some being novel associations not previously reported in

1  
2  
3 Japan. This study provided insights on comorbidities which could complicate care, clinical  
4  
5 practice, and outcomes among migraine patients.  
6  
7

8 *Keywords* - Comorbidities; Migraine; Prevalence Odds-ratio; Health Survey  
9

10  
11 *Trial registration* – Not applicable  
12  
13  
14  
15  
16

## 17 **ARTICLE SUMMARY**

### 18 **Strengths and limitations**

- 19  
20  
21  
22  
23 • An age-and-gender-stratified sampling frame was imposed during the recruitment to  
24 ensure and reflection of the general adult population of Japan in terms of age and  
25 gender.  
26  
27
- 28  
29  
30 • The study identified potential psychiatric and somatic comorbidities from self-reported  
31 medical history of migraine patients as well as several covariates including  
32 sociodemographic factors, general health characteristics and migraine-specific  
33 covariates  
34  
35
- 36  
37  
38 • This study uses an online survey and thus respondents without internet access were not  
39 included in the study  
40  
41
- 42  
43  
44 • This study assessed respondents' self-declaration of migraine manifestation and  
45 comorbidities which may bias the prevalence odds-ratio and the causal relationship  
46 between migraine and comorbidities cannot be concluded  
47  
48  
49  
50  
51  
52  
53  
54  
55  
56  
57  
58  
59  
60

## INTRODUCTION

Migraine is a common debilitating neurological disorder that is highly prevalent globally.[1] The global prevalence of migraine was approximately 14.0%, with annual prevalence estimates increasing over the years.[2] In Japan, the estimated prevalence of migraine among the general population was 6% in 2004,[3] and more recently, 9% among working, socially active individuals in the Tokyo metropolitan area.[4]

Previous reports demonstrated that approximately 90% of chronic migraine patients have at least one comorbidity.[5] A nationwide population-based study in the United States reported an association between migraine comorbidities and the intensity of headache pain and frequency.[6] It is important to take into consideration the comorbidities of migraine from diagnosis through to treatment.[7] The previously reported comorbidities of migraine include various psychiatric[8–11] and somatic conditions such as cardiovascular disorders,[12,13,6] gastrointestinal disorders,[6,14–16] allergy-related disorders,[6,17,18] sleep disorders,[6,19,20] and gynecological disorders.[21] A meta-analysis showed that the most frequently addressed comorbidities among migraine patients in clinical and population studies were depressive disorders, hypertension, and anxiety disorders.[22]

Studies have shown a strong bidirectional association between migraine and psychiatric conditions such as depression, anxiety, suicide risks,[9,10] and may have shared neuropathic mechanisms.[11,23] Similarly, somatic comorbidities such as those of cerebrovascular and metaboloendocrine (e.g., stroke, insulin sensitivity, hypothyroidism, endometriosis) also reportedly have bidirectional association with migraine.[23]

In Japan, there is an evidence gap on the comorbidities of migraine. Comorbidities such as hypertension, heart diseases, cerebrovascular diseases, depression, bipolar disorder, anxiety disorder, epilepsy, asthma, allergic diseases, and autoimmune diseases had been recognized as



1  
2  
3 common migraine comorbidities in the Clinical Practice Guideline for Chronic Headache.[24].  
4  
5 Although there were a few studies investigating the comorbidities of migraine in Japan,  
6  
7 previous studies primarily focused on one disease or one category of diseases.[25,26] However,  
8  
9 to our knowledge, no studies have been published that assessed a range of comorbidities  
10  
11 associated with migraine referencing non-migraine individuals in Japan.  
12  
13

14  
15 Therefore, the objectives of this study were to identify a list of potential psychiatric and somatic  
16  
17 comorbidities experienced by migraine patient as well as examine the association between  
18  
19 migraine and these psychiatric and somatic comorbidities in Japan by assessing the prevalence  
20  
21 odds ratio (POR) between migraine and these comorbidities, with reference to non-migraine  
22  
23 individuals. The initial findings from this study on the potential comorbidities of migraine may  
24  
25 provide insights to learning the etiology of migraine and help physicians and patients with  
26  
27 effective migraine management and treatment.  
28  
29  
30  
31  
32  
33  
34  
35  
36  
37

## 38 **METHODS**

39  
40 This study utilized existing data collected from a cross-sectional online survey, the 2017 Japan  
41  
42 National Health and Wellness Survey (NHWS). Individuals aged 18 years or older were  
43  
44 recruited to the NHWS through an existing, general-purpose (i.e., not healthcare-specific) web-  
45  
46 based consumer panel. All panelists explicitly agreed to join the panel and receive periodic  
47  
48 invitations to participate in online surveys. An age-and-gender-stratified sampling frame, based  
49  
50 on Japan governmental census data, was imposed during the recruitment from the panelists.  
51  
52 This was to ensure representativeness of panelists who completed the NHWS to reflect the  
53  
54 general adult population of Japan in terms of age and gender.  
55  
56  
57  
58  
59  
60

1  
2  
3 The NHWS was granted exemption status upon review by the Pearl Pathways Institutional  
4 Review Board (IN, US). All NHWS respondents provided informed consent prior to  
5 participation. This analysis was granted exemption by the Public Health Research Foundation  
6 Ethical Review Committee (Tokyo, Japan).  
7  
8  
9  
10  
11  
12  
13  
14  
15

## 16 **Study Population**

17  
18 Migraine patients in this study were defined by ICHD-3 (International Classification of  
19 Headache Disorders, 3<sup>rd</sup> Edition)-like criteria which was detailed in a previous publication  
20 using the same data,[27] among respondents who self-reported migraine in the past 12 months  
21 and self-reported having at least 4 monthly headache days (MHDs) (Figure 1). The ICHD-3  
22 like criteria was based on the diagnostic criteria from ICHD-3 but modified for the variables  
23 available in the existing NHWS data.[27] The ICHD-3 like inclusion criteria also defines  
24 migraine respondents without aura as having at least five migraines in the past 6 months or  
25 self-reported physician diagnosis of migraine, migraine lasting for at least four hours but not  
26 more than 72 hours if untreated, experienced at least two migraine pain symptoms (pain on one  
27 side of head; pulsating, throbbing or pounding pain; moderate-to-severe pain; or pain made  
28 worse by routine), and experienced at least in one migraine-related symptom (nausea and/or  
29 vomiting; light hypersensitivity; or sound hypersensitivity). Migraine with aura was defined as  
30 respondents having at least two migraines in the past 6 months or self-reported physician  
31 diagnosis of migraine, and experience migraine-related symptom (see spots, flashing lights; or  
32 heat waves) before or during the migraine. Respondents having migraine without aura or  
33 migraine with aura were also included as migraine patients in this study. Respondents who did  
34 not self-report migraine were classified as non-migraine respondents. There were no exclusion  
35 criteria.  
36  
37  
38  
39  
40  
41  
42  
43  
44  
45  
46  
47  
48  
49  
50  
51  
52  
53  
54  
55  
56  
57  
58  
59  
60

### *Patient and Public Involvement*

Respondents and/or the public were not involved in the design, or conduct, or reporting, or dissemination plans of our research.

### **Covariate and Outcome Assessment**

Sociodemographic and general health characteristics variables measured in this study included age, gender, marital status, level of education, household income, region, insurance type, employment status, Charlson comorbidity index (CCI),<sup>[28]</sup> body mass index (BMI), smoking status, alcohol use, and exercise behavior. Migraine-specific covariates were assessed using the Headache Impact Test-6 (HIT-6). The HIT-6 measures the impact of headaches on the respondents' ability to function in social situations including home and work. Higher HIT-6 depicts greater functional impairment.<sup>[29]</sup>

A list of potential psychiatric and somatic comorbidities was created from the self-reported medical history of the NHWS respondents (refer to full list in Figure 2 and Figure 3). The list includes diseases for which the associations with migraine have been reported; diseases for which the association may be explained from the pathophysiology; and other conditions of special interest related to treatment choices. All respondents answered the questions "Have you ever experienced ..." or "Have you experienced ... in the past 12 months" depending on the condition in NHWS.

## Statistical Analysis

Sociodemographic and health characteristics were summarized using counts and percentages for categorical variables and means and standard deviations (SDs) for continuous variables for migraine patients and non-migraine respondents.

Propensity score (PS) matching with 1:4 ratio of migraine patients to non-migraine respondents, using a greedy matching algorithm was conducted to create a matched comparison group of non-migraine respondents. Sociodemographic (age, gender, marital status, education, household income, region, insurance, and employment status) and general health characteristics (BMI, smoking status, alcohol use and exercise behavior) were used in the matching. Balance of matching were assessed using standardized mean differences (SMDs) between migraine patients and matched non-migraine respondents. Standardized mean differences greater than 0.1 were considered unbalanced after matching.

Prevalence of the selected psychiatric and somatic comorbidities among migraine patients and matched non-migraine respondents were calculated. Then, PS-matched prevalence odds-ratio (POR) and its 95% confidence intervals (CI) for each comorbidity were calculated to evaluate the potential associations of these conditions with migraine.

A post-hoc subgroup analysis was conducted among migraine patients with less than 15 MHDs (episodic migraine) and their respective matched non-migraine respondents, as well as among migraine patients with at least 15 MHDs (chronic migraine) and their respective matched non-migraine respondents.

All statistical analyses were performed using IBM SPSS version 25 and R3.5.1. No correction for multiple testing was conducted as the study was out of exploratory nature and no formal hypothesis testing was planned. P-values were provided as an indication of the difference between migraine patients and non-migraine respondents.

## RESULTS

### Participant demographics and health characteristics

A total of 30,001 respondents aged 18 years and older provided informed consent and participated in the 2017 Japan NHWS. Among these respondents, 378 respondents were identified as migraine patients and 25,209 respondents were identified as non-migraine respondents (Figure 1).

After PS matching, a total of 1,512 non-migraine respondents were identified and matching was found to be balanced between matched non-migraine respondents and migraine patients, with all SMDs less than 0.1 (Table 1).

### Sociodemographic and general health characteristics of migraine patients and matched non-migraine respondents are described in Table 1.

Migraine patients (N=378) had an average age of 41.6 and were predominantly females (79.9%). The majority (83.6%) of migraine patients in this study had severe impact (HIT-6 score: 60-78). The CCI, which was not part of the PS matching, was higher in migraine patients than matched non-migraine respondents (mean: 0.24 vs. 0.08).

**Table 1. Sociodemographic and general health characteristics among migraine patients and matched non-migraine respondents**

|                 | Migraine patients<br>(N=378) |       | Matched non-<br>migraine respondents<br>(N=1,512) |       | SMD   |
|-----------------|------------------------------|-------|---------------------------------------------------|-------|-------|
|                 | %                            | Count | %                                                 | Count |       |
| Age [Mean (SD)] | 41.6 (12.7)                  |       | 41.2 (15.2)                                       |       | 0.026 |

1  
2  
3  
4  
5  
6  
7  
8  
9  
10  
11  
12  
13  
14  
15  
16  
17  
18  
19  
20  
21  
22  
23  
24  
25  
26  
27  
28  
29  
30  
31  
32  
33  
34  
35  
36  
37  
38  
39  
40  
41  
42  
43  
44  
45  
46  
47  
48  
49  
50  
51  
52  
53  
54  
55  
56  
57  
58  
59  
60

|                                   |                                                                         |             |     |             |       |       |
|-----------------------------------|-------------------------------------------------------------------------|-------------|-----|-------------|-------|-------|
| Gender                            | <i>Male</i>                                                             | 20.1%       | 76  | 20.0%       | 303   | 0.002 |
|                                   | <i>Female</i>                                                           | 79.9%       | 302 | 80.0%       | 1,209 |       |
| Marital status                    | <i>Married or living with partner</i>                                   | 48.9%       | 185 | 49.0%       | 741   | 0.001 |
|                                   | <i>Divorced/ Separated/ Widowed/ Decline to answer</i>                  | 51.1%       | 193 | 51.0%       | 771   |       |
|                                   |                                                                         |             |     |             |       |       |
| Level of education                | <i>Completed university education</i>                                   | 41.3%       | 156 | 43.2%       | 653   | 0.042 |
|                                   | <i>Not completed</i>                                                    | 46.6%       | 176 | 44.6%       | 674   |       |
|                                   | <i>Decline to answer</i>                                                | 12.2%       | 46  | 12.2%       | 185   |       |
| Household income                  | <i>&lt;¥3,000,000</i>                                                   | 19.6%       | 74  | 18.9%       | 286   | 0.029 |
|                                   | <i>¥3,000,000 to &lt;¥5,000,000</i>                                     | 27.0%       | 102 | 27.6%       | 417   |       |
|                                   | <i>¥5,000,000 to &lt;¥8,000,000</i>                                     | 24.6%       | 93  | 23.9%       | 361   |       |
|                                   | <i>¥8,000,000 or more</i>                                               | 14.8%       | 56  | 15.4%       | 233   |       |
|                                   | <i>Decline to answer</i>                                                | 14.0%       | 53  | 14.2%       | 215   |       |
| Region                            | <i>Hokkaido</i>                                                         | 3.2%        | 12  | 2.9%        | 44    | 0.063 |
|                                   | <i>Tohoku</i>                                                           | 6.6%        | 25  | 7.1%        | 107   |       |
|                                   | <i>Kanto</i>                                                            | 39.4%       | 149 | 40.7%       | 615   |       |
|                                   | <i>Chubu</i>                                                            | 14.6%       | 55  | 14.6%       | 221   |       |
|                                   | <i>Kansai/Kinki</i>                                                     | 18.8%       | 71  | 16.9%       | 255   |       |
|                                   | <i>Chugoku</i>                                                          | 4.2%        | 16  | 4.4%        | 67    |       |
|                                   | <i>Shikoku</i>                                                          | 3.2%        | 12  | 3.7%        | 56    |       |
|                                   | <i>Kyushu/Okinawa</i>                                                   | 10.1%       | 38  | 9.7%        | 147   |       |
| Insurance type                    | <i>National health insurance</i>                                        | 52.1%       | 197 | 50.8%       | 768   | 0.034 |
|                                   | <i>Social insurance</i>                                                 | 44.7%       | 169 | 46.1%       | 697   |       |
|                                   | <i>Other (Late-stage elderly insurance / Other / None of the above)</i> | 3.2%        | 12  | 3.1%        | 47    |       |
|                                   |                                                                         |             |     |             |       |       |
| Employment status                 | <i>Currently not employed</i>                                           | 39.9%       | 151 | 40.6%       | 614   | 0.013 |
|                                   | <i>Currently employed</i>                                               | 60.1%       | 227 | 59.4%       | 898   |       |
| BMI                               | <i>Underweight (BMI&lt;18.5)</i>                                        | 18.3%       | 69  | 18.5%       | 280   | 0.045 |
|                                   | <i>Normal weight (18.5≤BMI&lt;25)</i>                                   | 62.4%       | 236 | 59.7%       | 903   |       |
|                                   | <i>Pre-obese (25≤BMI&lt;30)</i>                                         | 14.8%       | 56  | 13.6%       | 205   |       |
|                                   | <i>Obese (BMI≥30)</i>                                                   | 4.5%        | 17  | 4.0%        | 61    |       |
|                                   | <i>Decline to answer</i>                                                | 4.2%        | 16  | 4.2%        | 63    |       |
| Smoking status                    | <i>Never smoker</i>                                                     | 55.8%       | 211 | 56.7%       | 858   | 0.045 |
|                                   | <i>Former smoker</i>                                                    | 20.9%       | 79  | 19.1%       | 289   |       |
|                                   | <i>Current smoker</i>                                                   | 23.3%       | 88  | 24.1%       | 365   |       |
| Alcohol use                       | <i>Abstain</i>                                                          | 40.5%       | 153 | 40.8%       | 617   | 0.007 |
|                                   | <i>Currently consume alcohol</i>                                        | 59.5%       | 225 | 59.2%       | 895   |       |
| Vigorous exercise in past 30 days | <i>No</i>                                                               | 58.2%       | 220 | 60.0%       | 907   | 0.036 |
|                                   | <i>Yes</i>                                                              | 41.8%       | 158 | 40.0%       | 605   |       |
| CCI* [Mean (SD)]                  |                                                                         | 0.24 (0.86) |     | 0.08 (0.33) |       | 0.242 |
| HIT-6 impact grades*              | <i>Little-to-no impact (HIT-6 score: 36-49)</i>                         | 1.1%        | 4   | -           | -     | -     |
|                                   | <i>Moderate impact (HIT-6 score: 50-55)</i>                             | 6.6%        | 25  | -           | -     | -     |
|                                   | <i>Substantial impact (HIT-6 score: 56-59)</i>                          | 8.7%        | 33  | -           | -     | -     |
|                                   | <i>Severe impact (HIT-6 score: 60-78)</i>                               | 83.6%       | 316 | -           | -     | -     |

BMI, body mass index; CCI, Charlson comorbidity index; SMD, standardized mean difference.

\* CCI and HIT-6 impact grades are not included in the propensity score matching.

## **Psychiatric comorbidities in migraine patients vs. matched non-migraine respondents**

### **(Figure 2)**

The psychiatric comorbidities with prevalence higher than 5.0% in migraine patients were depression (22.2%), post-traumatic stress disorder (PTSD) (7.7%), anxiety disorders (6.1% for phobias to 14.6% for anxiety), and obsessive-compulsive disorder (OCD) (5.0%).

Among the comorbidities with relatively high prevalence (5.0% or higher) in migraine patients, migraine patients had a significantly higher odds than matched non-migraine respondents for PTSD (PS-matched POR [95% CI]: 11.3 [5.4, 25.4]), various anxiety disorders (generalized anxiety disorder (GAD): 9.9 [5.1, 20.3] to social anxiety disorder (4.9 [3.0, 7.8]), OCD (5.3 [2.5, 11.3]), and depression (2.9 [2.1, 3.9]).

## **Somatic comorbidities in migraine patients vs. matched non-migraine respondents**

### **(Figure 3)**

#### *Gastrointestinal comorbidities*

Most of the gastrointestinal comorbidities assessed in this study showed the prevalence higher than 5.0% in migraine patients: heartburn (42.6%), chronic constipation (28.8%), frequent diarrhea (26.2%), gastroesophageal reflux disease (GERD) (20.6%), irritable bowel syndrome (19.8%), and ulcers (11.4%).

Among the gastrointestinal comorbidities with relatively high prevalence, compared with matched non-migraine respondents, migraine patients had a significantly higher odds for irritable bowel syndrome (PS-matched POR [95% CI]: 3.8 [2.7, 5.4]), heartburn (3.6 [2.8, 4.7]),

1  
2  
3 GERD (3.5 [2.5, 4.8]), ulcers (3.1 [2.0, 4.8]), frequent diarrhea (3.1 [2.3, 4.1]) and chronic  
4  
5 constipation (2.5 [1.9, 3.3]).  
6  
7

#### 8 *Allergy-related comorbidities*

9  
10 All the allergy-related comorbidities assessed in this study have a prevalence higher than 5.0%  
11  
12 in migraine patients: allergies (43.1%), hay fever (44.2%), atopic dermatitis (19.6%), and  
13  
14 asthma (17.5%).  
15  
16

17  
18 Compared with matched non-migraine respondents, migraine patients had a significantly  
19  
20 higher odds for allergies (PS-matched POR [95% CI]: 3.0 [2.3, 3.8]), hay fever (2.9 [2.2, 3.6]),  
21  
22 asthma (2.2 [1.6, 3.1]), and atopic dermatitis (2.0 [1.5, 2.7]).  
23  
24  
25

#### 26 *Sleep comorbidities*

27  
28 The following sleep disorders presented in migraine patients with a prevalence higher than  
29  
30 5.0% included insomnia (35.4%) and sleep difficulties (12.7%). Migraine patients had a  
31  
32 significantly higher odds for insomnia (PS-matched POR [95% CI]: 4.3 [3.3, 5.7]) and sleep  
33  
34 difficulties (4.1 [2.7, 6.3]), compared to matched non-migraine respondents.  
35  
36  
37

#### 38 *Gynecological comorbidities*

39  
40 The gynecological disorders assessed in this study with a prevalence higher than 5.0% among  
41  
42 migraine patients were pre-menstrual syndrome (32.1%), pre-menstrual dysphoric disorder  
43  
44 (19.9%), fibroid (13.0%), and endometriosis (9.5%). Compared with matched non-migraine  
45  
46 respondents, migraine patients had a significantly higher odds for pre-menstrual dysphoric  
47  
48 disorder (PS-matched POR [95% CI]: 5.5 [3.6, 8.4]), pre-menstrual syndrome (5.3 [3.8, 7.4]),  
49  
50 endometriosis (2.4 [1.5, 3.7]), and fibroids (1.8 [1.2, 2.6]).  
51  
52  
53  
54

#### 55 *Cardiovascular comorbidities*

56  
57 The cardiovascular disorders assessed in this study showed a lower than 5.0% prevalence  
58  
59 among migraine patients except for high blood pressure (hypertension) (7.4%). Compared with  
60



1  
2  
3 matched non-migraine respondents, the odds of having hypertension, heart attack, stroke, or  
4 mini-stroke/transient ischemic attack (TIA) were not significantly different in migraine  
5  
6 patients.  
7  
8  
9

### 10 *Other comorbidities*

11  
12 Most other disorders assessed in this study showed the prevalence lower than 5.0% among  
13 migraine patients except for anemia (23.3%), thyroid condition (5.8%), and restless leg  
14  
15 syndrome (5.8%). Compared with matched non-migraine respondents, migraine patients had a  
16 significantly higher odds for restless leg syndrome (PS-matched POR [95% CI]: 2.9 [1. 6, 5.1]),  
17  
18 thyroid condition (2.9 [1. 6, 5.1]) and anemia (2.3 [1.7, 3.1]). Compared with matched non-  
19  
20 migraine respondents, migraine patients had a significantly higher odds for fibromyalgia  
21  
22 (prevalence among migraine patients: 1.6%; POR [95% CI]: 12.2 [2.2, 123.7]). For all other  
23  
24 disorders assessed in this study (rheumatoid arthritis, lupus, Parkinson's disease, epilepsy,  
25  
26 genital herpes, genital warts, and breast cancer), the odds among migraine patients were not  
27  
28 different from matched non-migraine respondents.  
29  
30  
31  
32  
33  
34  
35  
36  
37  
38  
39

### 40 **Post-hoc subgroup analysis by MHDs**

41  
42 Majority of the baseline characteristics remained balanced at the subgroup level (results not  
43  
44 shown). Post-hoc analysis demonstrated consistent results in both subgroups of the migraine  
45  
46 patients MHDs<15 and MHDs≥15 with the overall analysis. The most prevalent psychiatric  
47  
48 and somatic comorbidities were similar in both migraine patients with MHDs<15 and migraine  
49  
50 patients with MHDs≥15 (Supplementary Tables 1 and 2).  
51  
52  
53

54  
55 Migraine patients with MHDs≥15 tended to have higher point estimates for POR although  
56  
57 formal statistical testing was not performed to assess the interaction for the association between  
58  
59 comorbidities and migraine by MHD.  
60

## DISCUSSION

This study showed that patients with migraine have a significantly higher prevalence for various psychiatric and somatic comorbidities, compared with matched non-migraine respondents. Our study is the first to report the broad range of comorbidities associated with migraine as a population-based study in Japan.

Potential pathological mechanisms for comorbidities were proposed – for example, uni- or bi-directional causality or shared environmental or genetic risk factors.[23] Although various explanations for the association between migraines and psychiatric conditions have been proposed, exact causal relationships and mechanisms for the associations are yet to be elucidated in this study.

### Psychiatric comorbidities

Psychiatric disorders that our study found associated with migraine such as PTSD, anxiety disorders, OCD and depression have been described in previous literature.[8–11] Various neurotransmitter systems and brain regions implicated in psychiatric disorders have been postulated to overlap with that in migraine.[7,11,23] Neurotransmitters such as serotonin and other monoamines, and ovarian hormonal influences, might lead to serotonergic processing dysfunction and hypothalamic-pituitary-adrenal (HPA) axis dysregulation which underlie most psychiatric disorders.[23] For instance, migraine patients exhibit ictal or interictal alterations in neurotransmitters blood levels which share common pathophysiology to depression, stress, and bipolar disorder.[7,23] Genetic factors could also potentially influence the association between migraine and psychiatric disorders. A genome-wide association study with over 1

1  
2  
3 million individuals found significantly overlapped genetic risks of migraine with psychiatric  
4 conditions such as attention-deficit/hyperactivity disorder (ADHD) or depression.[30]  
5  
6 Emerging functional neuroimaging hint at that possibility of long-term chronic migraine could  
7 alter brain activity and increase disease burden,[7,11] implying a need to understand the shared  
8 pathophysiology of psychiatric comorbidities and migraine to facilitate better management of  
9 both conditions among patients.  
10  
11  
12  
13  
14  
15  
16  
17  
18  
19

## 20 **Somatic comorbidities**

### 21 *Gastrointestinal comorbidities*

22  
23 We found that bowel movement dysregulations such as constipation, diarrhea, and irritable  
24 bowel syndrome, are more prevalent in migraine patients than matched non-migraine  
25 respondents, which was consistent with previous literature.[14–16] Autonomic nervous system  
26 dysfunction and other mechanisms such as dysregulation of neuroendocrine, immunological  
27 factors, the brain-gut axis, or intestinal microbiota[15] were thought as potential mechanisms  
28 to alter visceral sensitivity and common pathology with migraine.  
29  
30  
31  
32  
33  
34  
35  
36  
37  
38

39 Both GERD[16] and gastric ulcer[6,16] were shown to have higher prevalence in migraine  
40 patients than matched non-migraine respondents in this study. Association of migraine with  
41 *Helicobacter pylori* infection has been shown in a meta-analysis of observational studies,[31]  
42 and this may explain the high prevalence of GERD and gastric ulcer in migraine patients[15]  
43  
44  
45  
46  
47  
48 Other possible explanations for the association between migraine and gastrointestinal disorders  
49 includes analgesics use in migraine patients.[15,18]  
50  
51  
52

### 53 *Allergy-related comorbidities*

54  
55 In this study, migraine patients were more likely to have allergy-related comorbidities, which  
56 are consistent with previous research.[6,17,18] The association between migraine and allergy-  
57  
58  
59  
60

1  
2  
3 related comorbidities could in part be due to common pathophysiology of inflammatory  
4 (including neuroinflammation), immune, and genetic factors.[17,23]  
5  
6

### 7 8 *Sleep comorbidities* 9

10 Migraine patients in this study had a significantly increased prevalence for sleep disorders  
11 including insomnia and sleep difficulties, compared to non-migraine respondents, consistent  
12 with previous studies.[6,19,20] A large population-based study reported that those with  
13 comorbid migraine and poor sleep showed significantly poorer anxiety and depression  
14 scores.[20] The association between migraine and sleep disorders is thought to be bidirectional:  
15 headache was shown to be a risk factor for insomnia, while insomnia (and oversleeping) had  
16 been reportedly to be a contributing factor of migraine attacks.[11,32] It was suggested that  
17 aminergic neurotransmitter systems such as those involved in the sleep-wake cycle could  
18 underlie the association between migraine and sleep disorders.[11,23,32]  
19  
20  
21  
22  
23  
24  
25  
26  
27  
28  
29  
30

### 31 32 *Gynecological comorbidities* 33

34 Headache has been known to be a common symptom for perimenstrual syndrome.[33]  
35 Furthermore, the association between endometriosis and migraine was previously  
36 reported,[21,23] wherein the occurrence of endometriosis was more frequent among women  
37 with migraines than women without.[23] The findings from the present study were consistent  
38 with the previous research. The association between migraines and gynecological  
39 comorbidities could be due to hormonal changes in women throughout the menstrual cycle or  
40 during menopause which may cause migraine through estrogen-mediated pathways including  
41 the association of estrogen receptor markers from genetic studies.[34]  
42  
43  
44  
45  
46  
47  
48  
49  
50  
51  
52

### 53 54 *Cardiovascular comorbidities* 55

56 Previous studies pointed out the association between migraine and cardiovascular conditions  
57 such as hypertension,[6] myocardial infarction[6,13] and stroke,[6,12,13] and the association  
58  
59  
60

1  
2  
3 specifically on migraine with aura[12,13] or other risk factors such as age, smoking habit, and  
4 use of oral contraceptives.[12] However, no association was observed between migraine and  
5 cardiovascular conditions such as hypertension, probably due to the younger age of migraine  
6 patients in this study or small numbers of high-risk migraine patients for cardiovascular  
7 conditions.  
8  
9

### 15 *Other comorbidities*

16  
17 As found in our study, anemia,[35] and thyroid dysfunction[36] have been described as  
18 comorbidities of migraine. Similarly, restless leg syndrome[25] has been shown for the  
19 association, although the association may be controversial.[37]  
20  
21  
22

23  
24 The observation on the relationship between migraine and fibromyalgia in this study is  
25 consistent with previous studies.[38] Fibromyalgia may share a pathological pathway with  
26 migraine through chronic hypothalamic neuroendocrine dysfunction, resulting in abnormal  
27 central nervous system sensory processing.[39]  
28  
29  
30  
31  
32  
33  
34  
35  
36  
37

### 38 **Clinical Implications**

39  
40 Although some of the associations are not solidly established with potential pathological  
41 explanation, the findings from this study appear to have clinical importance. Various  
42 comorbidities are at high prevalence among migraine patients. Migraine patients may  
43 experience impairment for daily life and loss of productivity not only because of the migraine  
44 but also its comorbidities. In the treatment of migraine, comorbidities may influence  
45 therapeutic choices in two ways. First, by taking comorbidities into consideration, medication  
46 regimens could be selected to treat for both migraine and comorbidities simultaneously.  
47  
48 Second, therapeutic options for migraine may be limited if there are comorbidities as  
49 contraindications to migraine medications.[40] Therefore, accounting for comorbidities which  
50  
51  
52  
53  
54  
55  
56  
57  
58  
59  
60

1  
2  
3 could complicate care in clinical practice is warranted when considering appropriate  
4 therapeutic options for migraine management.[24,40] Additionally, with the growing migraine  
5 prevalence,[2] elucidating the associated comorbidities may provide insights to the shared  
6  
7  
8  
9  
10  
11  
12  
13  
14  
15  
16  
17  
18  
19  
20  
21  
22  
23  
24  
25  
26  
27  
28  
29  
30  
31  
32  
33  
34  
35  
36  
37  
38  
39  
40  
41  
42  
43  
44  
45  
46  
47  
48  
49  
50  
51  
52  
53  
54  
55  
56  
57  
58  
59  
60

physiopathology with migraine which could facilitate effective management and treatment of migraine.[7]

### **Limitations**

There are a few limitations to be mentioned for this study. NHWS is cross-sectional and causal relationship between migraine and comorbidities cannot be concluded, i.e., if the comorbidities were induced by migraine or treatment for migraine or vice versa. In addition, respondents self-reported their migraine symptoms as well as comorbidities, which may lead to potential recall bias. Although ICHD-3 like criteria were created for this study using available self-reported data as objective classification criteria and to minimize misclassification, discrepancies between the criteria used in this study and the formal ICHD-3 criteria still exist. As such, the interpretation of the findings in this study would only be valid in comparison with the groups defined within this study. Additionally, NHWS is an online survey and thus respondents without access to internet or internet-related technology (such as those with more severe comorbidities or older respondents) were not included in the study and may not be well-represented in this study. Lastly, patient demographics such as gender and lifestyle could potentially influence the association of migraine with psychiatric and/or somatic comorbidities which was not explored and warrants further investigation.

### **CONCLUSION**

1  
2  
3 Our study found that migraine patients are more likely to have psychiatric and somatic  
4 comorbidities compared with matched non-migraine respondents, some of which are novel  
5 ones previously unreported (e.g., OCD, gastrointestinal comorbidities, sleep comorbidities,  
6 gynecological comorbidities) in Japan. This study showed that migraine patients in Japan face  
7 an additional comorbid burden and provided insights to types of comorbidities that patients  
8 with migraine may suffer. As such, accounting for comorbidities, which could usually  
9 complicate care, when treating migraine would help in good clinical practice and improve  
10 outcomes among migraine patients.  
11  
12  
13  
14  
15  
16  
17  
18  
19  
20  
21  
22  
23  
24  
25  
26  
27

### 28 **Ethics approval and consent to participate**

29  
30 The 2017 Japan NHWS survey was approved with exemption status upon review by Pearl  
31 Institutional Review Board (Indianapolis, IN, IRB Study Number: 17-KANT-150). All NHWS  
32 respondents provided informed online consent prior to participating. Study participants or the  
33 public were not involved in the design, or conduct, or reporting, or dissemination plans of our  
34 research. This database study was also granted exemption by the Public Health Research  
35 Foundation (<https://www.phrf.jp/>), Japan.  
36  
37  
38  
39  
40  
41  
42  
43  
44

45 Patient consent form: Not required  
46  
47  
48  
49  
50

### 51 **Consent for publication**

52 Not applicable.  
53  
54  
55  
56  
57  
58  
59  
60

## **Funding**

This work was supported by Amgen K.K. grant number [funding/grant number: not available].

## **Competing interests**

SK and TT received consultation fee for this study. YC is an employee at Cerner Enviza, Singapore. Cerner Enviza received funding from Amgen K.K. for conduction of the analysis and manuscript development. MH and KI are employees at Amgen K.K., and KA is a former employee at Amgen K.K. and is currently an employee of IQVIA Solutions Japan, K.K. MH holds, and KA held stocks of Amgen Inc.

## **Author contributions**

SK, YC, KI, MH, KA, and TT conceptualized and designed the study. YC analyzed the data. SK, YC, KI, MH, KA, and TT interpreted the results and contributed to the original draft of the manuscript. All authors read and approve the final manuscript.

## **Acknowledgements**

The authors would like to thank Amanda Woo from Cerner Enviza for support with development, writing and editing of the manuscript.

## **Data sharing statement**

Study data to support our findings are available from Cerner Enviza, but availability of the data is restricted and was used under license for this study and are not publicly available. Data are,



1  
2  
3 however, available from the authors upon reasonable request and with the permission of Cerner  
4  
5 Enviza.  
6  
7  
8  
9  
10  
11  
12  
13

14 I, the Submitting Author has the right to grant and does grant on behalf of all authors of the  
15 Work (as defined in the below author licence), an exclusive licence and/or a non-exclusive  
16 licence for contributions from authors who are: i) UK Crown employees; ii) where BMJ has  
17 agreed a CC-BY licence shall apply, and/or iii) in accordance with the terms applicable for US  
18 Federal Government officers or employees acting as part of their official duties; on a  
19 worldwide, perpetual, irrevocable, royalty-free basis to BMJ Publishing Group Ltd (“BMJ”)  
20 its licensees and where the relevant Journal is co-owned by BMJ to the co-owners of the  
21 Journal, to publish the Work in BMJ Global Health and any other BMJ products and to exploit  
22 all rights, as set out in our licence.  
23  
24  
25  
26  
27  
28  
29  
30  
31  
32  
33  
34

35 The Submitting Author accepts and understands that any supply made under these terms is  
36 made by BMJ to the Submitting Author unless you are acting as an employee on behalf of your  
37 employer or a postgraduate student of an affiliated institution which is paying any applicable  
38 article publishing charge (“APC”) for Open Access articles. Where the Submitting Author  
39 wishes to make the Work available on an Open Access basis (and intends to pay the relevant  
40 APC), the terms of reuse of such Open Access shall be governed by a Creative Commons  
41 licence – details of these licences and which Creative Commons licence will apply to this Work  
42 are set out in our licence referred to above.  
43  
44  
45  
46  
47  
48  
49  
50  
51  
52  
53  
54  
55  
56  
57  
58  
59  
60

## REFERENCES

- 1 Steiner TJ, Stovner LJ, Jensen R, *et al.* Migraine remains second among the world's causes of disability, and first among young women: findings from GBD2019. *J Headache Pain* 2020;**21**:137. doi:10.1186/s10194-020-01208-0
- 2 Stovner LJ, Hagen K, Linde M, *et al.* The global prevalence of headache: an update, with analysis of the influences of methodological factors on prevalence estimates. *J Headache Pain* 2022;**23**:34. doi:10.1186/s10194-022-01402-2
- 3 Takeshima T, Ishizaki K, Fukuhara Y, *et al.* Population-Based Door-to-Door Survey of Migraine in Japan: The Daisen Study. *Headache J Head Face Pain* 2004;**44**:8–19. doi:10.1111/j.1526-4610.2004.04004.x
- 4 Suzuki N, Ishikawa Y, Gomi S, *et al.* Prevalence and characteristics of headaches in a socially active population working in the Tokyo metropolitan area -surveillance by an industrial health consortium. *Intern Med Tokyo Jpn* 2014;**53**:683–9. doi:10.2169/internalmedicine.53.1700
- 5 Lipton RB, Fanning KM, Buse DC, *et al.* Identifying Natural Subgroups of Migraine Based on Comorbidity and Concomitant Condition Profiles: Results of the Chronic Migraine Epidemiology and Outcomes (CaMEO) Study. *Headache* 2018;**58**:933–47. doi:10.1111/head.13342
- 6 Buse DC, Reed ML, Fanning KM, *et al.* Comorbid and co-occurring conditions in migraine and associated risk of increasing headache pain intensity and headache frequency: results of the migraine in America symptoms and treatment (MAST) study. *J Headache Pain* 2020;**21**:23. doi:10.1186/s10194-020-1084-y
- 7 Dresler T, Caratozzolo S, Guldolf K, *et al.* Understanding the nature of psychiatric comorbidity in migraine: a systematic review focused on interactions and treatment implications. *J Headache Pain* 2019;**20**:51. doi:10.1186/s10194-019-0988-x
- 8 Minen MT, Begasse De Dhaem O, Kroon Van Diest A, *et al.* Migraine and its psychiatric comorbidities. *J Neurol Neurosurg Psychiatry* 2016;**87**:741–9. doi:10.1136/jnnp-2015-312233
- 9 Ziplow J. The Psychiatric Comorbidities of Migraine in Children and Adolescents. *Curr Pain Headache Rep* 2021;**25**:69. doi:10.1007/s11916-021-00983-y
- 10 Pompili M, Serafini G, Di Cosimo D, *et al.* Psychiatric comorbidity and suicide risk in patients with chronic migraine. *Neuropsychiatr Dis Treat* 2010;**6**:81–91. doi:10.2147/ndt.s8467
- 11 Karsan N, Goadsby PJ. Migraine Is More Than Just Headache: Is the Link to Chronic Fatigue and Mood Disorders Simply Due to Shared Biological Systems? *Front Hum Neurosci* 2021;**15**:646692. doi:10.3389/fnhum.2021.646692
- 12 Al-Hassany L, Linstra KA, Terwindt GM, *et al.* Cardiovascular Risk of Migraine in Men and Women. In: Maassen van den Brink A, MacGregor EA, eds. *Gender and Migraine*. Cham: : Springer International Publishing 2019. 17–29. doi:10.1007/978-3-030-02988-3\_2

- 13 Adelborg K, Szépligeti SK, Holland-Bill L, *et al.* Migraine and risk of cardiovascular diseases: Danish population based matched cohort study. *BMJ* 2018;**360**:k96. doi:10.1136/bmj.k96
- 14 Lau C-I, Lin C-C, Chen W-H, *et al.* Association between migraine and irritable bowel syndrome: a population-based retrospective cohort study. *Eur J Neurol* 2014;**21**:1198–204. doi:10.1111/ene.12468
- 15 Cámara-Lemarroy CR, Rodríguez-Gutierrez R, Monreal-Robles R, *et al.* Gastrointestinal disorders associated with migraine: A comprehensive review. *World J Gastroenterol* 2016;**22**:8149–60. doi:10.3748/wjg.v22.i36.8149
- 16 Aamodt AH, Stovner LJ, Hagen K, *et al.* Comorbidity of headache and gastrointestinal complaints. The Head-HUNT Study. *Cephalalgia Int J Headache* 2008;**28**:144–51. doi:10.1111/j.1468-2982.2007.01486.x
- 17 Wang L, Deng Z-R, Zu M-D, *et al.* The Comorbid Relationship Between Migraine and Asthma: A Systematic Review and Meta-Analysis of Population-Based Studies. *Front Med* 2021;**7**:609528. doi:10.3389/fmed.2020.609528
- 18 Aamodt AH, Stovner LJ, Langhammer A, *et al.* Is headache related to asthma, hay fever, and chronic bronchitis? The Head-HUNT Study. *Headache* 2007;**47**:204–12. doi:10.1111/j.1526-4610.2006.00597.x
- 19 Uhlig BL, Engstrøm M, Ødegård SS, *et al.* Headache and insomnia in population-based epidemiological studies. *Cephalalgia Int J Headache* 2014;**34**:745–51. doi:10.1177/0333102414540058
- 20 Song T-J, Cho S-J, Kim W-J, *et al.* Poor sleep quality in migraine and probable migraine: a population study. *J Headache Pain* 2018;**19**:58. doi:10.1186/s10194-018-0887-6
- 21 Tietjen GE, Conway A, Utley C, *et al.* Migraine is associated with menorrhagia and endometriosis. *Headache* 2006;**46**:422–8. doi:10.1111/j.1526-4610.2006.00290.x
- 22 Caponnetto V, Deodato M, Robotti M, *et al.* Comorbidities of primary headache disorders: a literature review with meta-analysis. *J Headache Pain* 2021;**22**:71. doi:10.1186/s10194-021-01281-z
- 23 Altamura C, Corbelli I, de Tommaso M, *et al.* Pathophysiological Bases of Comorbidity in Migraine. *Front Hum Neurosci* 2021;**15**:640574. doi:10.3389/fnhum.2021.640574
- 24 Araki N, Takeshima T, Ando N, *et al.* Clinical practice guideline for chronic headache 2013. Published Online First: 2019. <https://onlinelibrary.wiley.com/doi/abs/10.1111/ncn3.12322> (accessed 17 Jul 2020).
- 25 Suzuki S, Suzuki K, Miyamoto M, *et al.* Evaluation of contributing factors to restless legs syndrome in migraine patients. *J Neurol* 2011;**258**:2026–35. doi:10.1007/s00415-011-6064-3
- 26 Yamada K, Moriwaki K, Oiso H, *et al.* High prevalence of comorbidity of migraine in outpatients with panic disorder and effectiveness of psychopharmacotherapy for both

- 1  
2  
3 disorders: a retrospective open label study. *Psychiatry Res* 2011;**185**:145–8.  
4 doi:10.1016/j.psychres.2009.08.004  
5  
6  
7 27 Kikui S, Chen Y, Todaka H, *et al.* Burden of migraine among Japanese patients: a cross-  
8 sectional National Health and Wellness Survey. *J Headache Pain* 2020;**21**:110.  
9 doi:10.1186/s10194-020-01180-9  
10  
11 28 Quan H, Li B, Couris CM, *et al.* Updating and Validating the Charlson Comorbidity Index  
12 and Score for Risk Adjustment in Hospital Discharge Abstracts Using Data From 6  
13 Countries. *Am J Epidemiol* 2011;**173**:676–82. doi:10.1093/aje/kwq433  
14  
15 29 Fumihiko S, Yasuo F, Makoto I, *et al.* Evaluation of Reliability of the Japanese Version  
16 “Headache Impact Test (HIT-6)” | Article Information | J-GLOBAL. *臨床医薬*  
17 2004;**20**:1045–54.  
18  
19 30 Brainstorm Consortium, Anttila V, Bulik-Sullivan B, *et al.* Analysis of shared heritability  
20 in common disorders of the brain. *Science* 2018;**360**. doi:10.1126/science.aap8757  
21  
22 31 Su J, Zhou X-Y, Zhang G-X. Association between Helicobacter pylori infection and  
23 migraine: a meta-analysis. *World J Gastroenterol* 2014;**20**:14965–72.  
24 doi:10.3748/wjg.v20.i40.14965  
25  
26 32 Waliszewska-Prosół M, Nowakowska-Kotas M, Chojdak-Lukasiewicz J, *et al.* Migraine  
27 and Sleep—An Unexplained Association? *Int J Mol Sci* 2021;**22**:5539.  
28 doi:10.3390/ijms22115539  
29  
30 33 Hofmeister S, Bodden S. Premenstrual Syndrome and Premenstrual Dysphoric Disorder.  
31 *Am Fam Physician* 2016;**94**:236–40.  
32  
33 34 Cupini LM, Corbelli I, Sarchelli P. Menstrual migraine: what it is and does it matter? *J*  
34 *Neurol* 2021;**268**:2355–63. doi:10.1007/s00415-020-09726-2  
35  
36 35 Tayyebi A, Poursadeghfard M, Nazeri M, *et al.* Is There Any Correlation between Migraine  
37 Attacks and Iron Deficiency Anemia? A Case-Control Study. *Int J Hematol-Oncol Stem*  
38 *Cell Res* 2019;**13**:164.  
39  
40 36 Spanou I, Bougea A, Liakakis G, *et al.* Relationship of Migraine and Tension-Type  
41 Headache With Hypothyroidism: A Literature Review. *Headache* 2019;**59**:1174–86.  
42 doi:10.1111/head.13600  
43  
44 37 Trenkwalder C, Allen R, Högl B, *et al.* Restless legs syndrome associated with major  
45 diseases: A systematic review and new concept. *Neurology* 2016;**86**:1336–43.  
46 doi:10.1212/WNL.0000000000002542  
47  
48 38 Penn I-W, Chuang E, Chuang T-Y, *et al.* Bidirectional association between migraine and  
49 fibromyalgia: retrospective cohort analyses of two populations. *BMJ Open*  
50 2019;**9**:e026581. doi:10.1136/bmjopen-2018-026581  
51  
52 39 Valença MM, Medeiros FL, Martins HA, *et al.* Neuroendocrine dysfunction in  
53 fibromyalgia and migraine. *Curr Pain Headache Rep* 2009;**13**:358–64.  
54 doi:10.1007/s11916-009-0058-1  
55  
56  
57  
58  
59  
60

1  
2  
3 40 Lipton RB, Silberstein SD. Why study the comorbidity of migraine? *Neurology*  
4 1994;44:S4-5.  
5  
6  
7  
8  
9  
10  
11  
12

13 **Figure legends**

14  
15 **Figure 1. Respondent flow chart**

16  
17  
18 **Figure 2. Propensity score-matched prevalence odds ratio for psychiatric comorbidities**

19  
20  
21 **Figure 3. Propensity score-matched prevalence odds ratio for somatic comorbidities**  
22  
23  
24  
25  
26  
27  
28  
29  
30  
31  
32  
33  
34  
35  
36  
37  
38  
39  
40  
41  
42  
43  
44  
45  
46  
47  
48  
49  
50  
51  
52  
53  
54  
55  
56  
57  
58  
59  
60

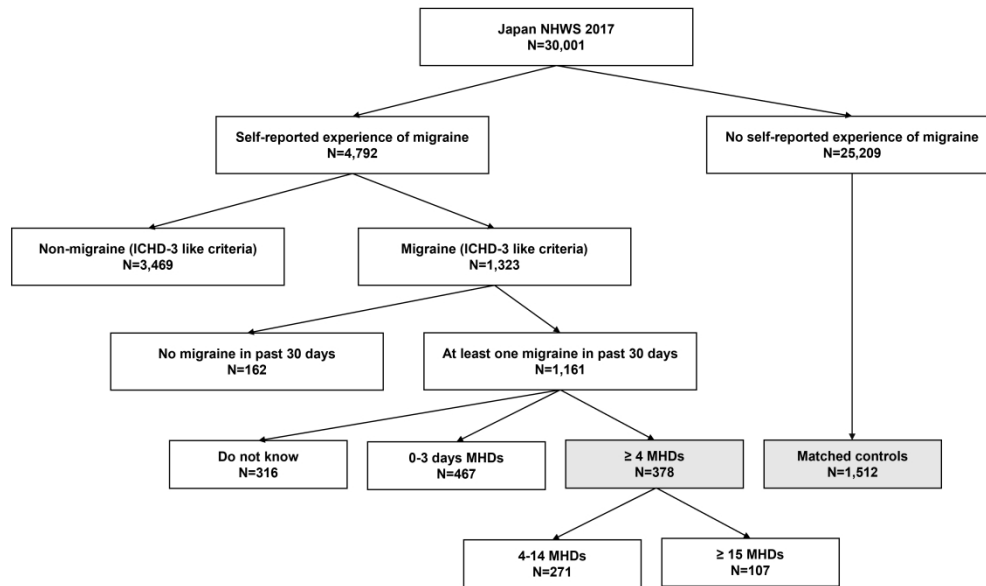

ICHD-3, International Classification of Headache Disorder, 3<sup>rd</sup> Edition; MHDs, Monthly Headache Days.

Note: Shaded squares indicate the study populations – migraine patients ( $\geq 4$  MHDs;  $N=378$ ) and matched non-migraine respondents (Matched controls,  $N=1,512$ ).

Figure 1. Respondent flow chart

130x86mm (800 x 800 DPI)

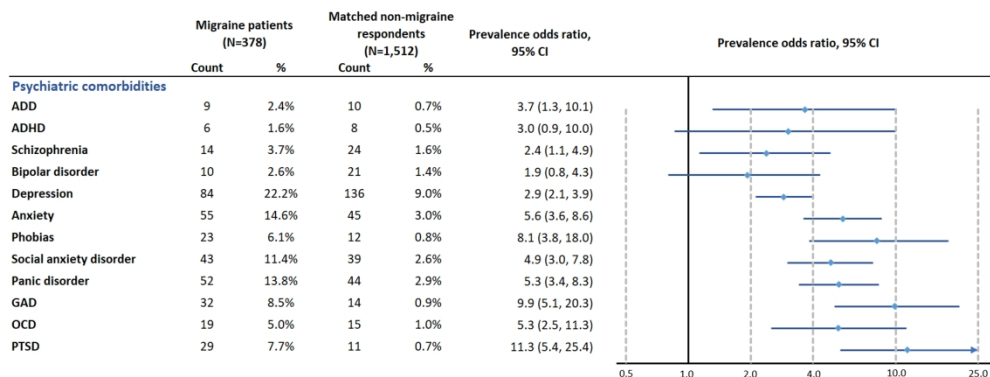

ADD, attention-deficit disorder; ADHD, attention-deficit/hyperactivity disorder; GAD, generalized anxiety disorder; OCD, obsessive-compulsive disorder; PTSD, posttraumatic stress disorder.  
 Note: Comorbidities with prevalence between 5% to 10% among migraine patients: phobias, GAD, OCD, and PTSD. Comorbidities with more than 10% prevalence among migraine patients: depression, anxiety, social anxiety disorder, and panic disorder.

Figure 2. Propensity score-matched prevalence odds ratio for psychiatric comorbidities

139x67mm (800 x 800 DPI)

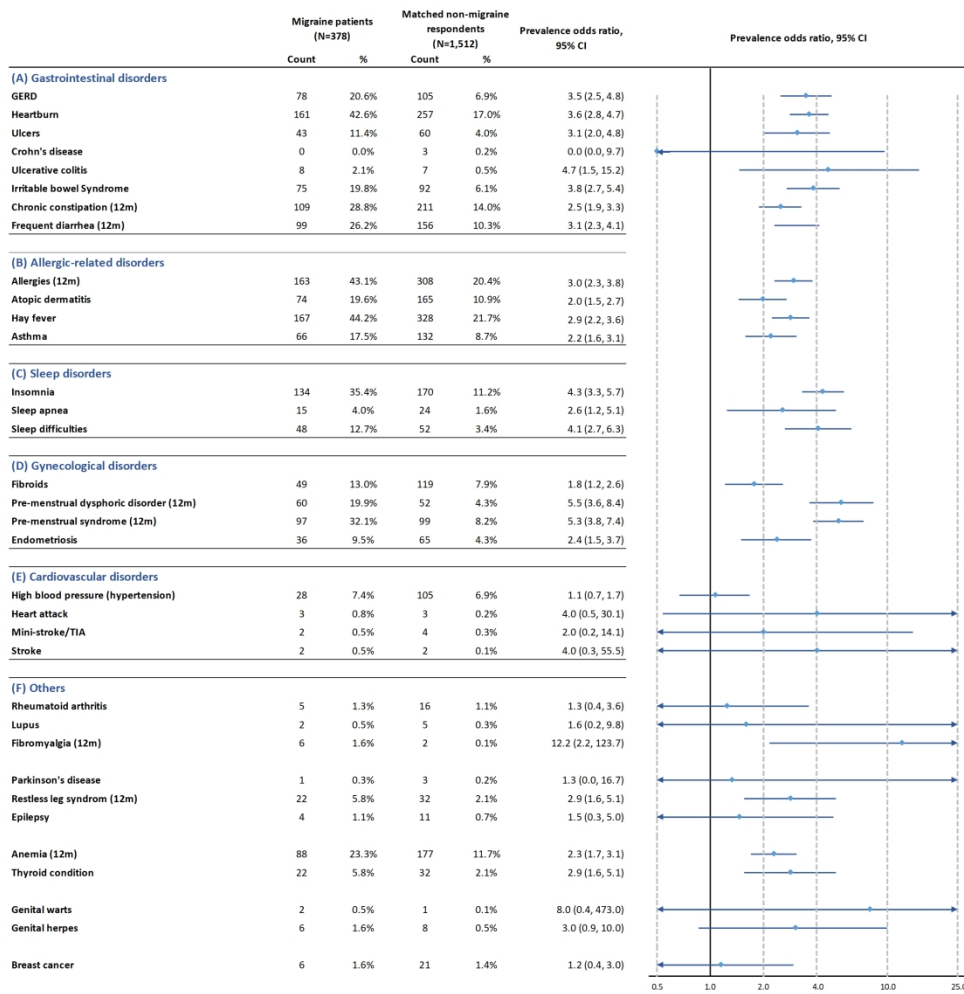

GERD, gastroesophageal reflux disease; TIA, transient ischemia attack.  
 Note: Comorbidities with prevalence between 5% to 10% among migraine patients: endometriosis, high blood pressure, restless leg syndrome, and thyroid condition. Comorbidities with more than 10% prevalence among migraine patients: irritable bowel syndrome, heartburn, GERD, ulcers, frequent diarrhea, chronic constipation, allergies, hay fever, asthma, atopic dermatitis, insomnia, sleep difficulties, pre-menstrual dysphoric disorder, pre-menstrual syndrome, fibroids, and anemia.

Figure 3. Propensity score-matched prevalence odds ratio for somatic comorbidities

86x94mm (800 x 800 DPI)



**Supplementary Table 1. Propensity score-matched prevalence odds ratio for psychiatric comorbidities among patients with migraine with <15 monthly headache days vs. ≥15 monthly headache days**

|                                | Migraine patients<br>MHDs<15<br>(N=271) |       | Matched non-migraine<br>respondents<br>(N=1,084) |      | Prevalence odds<br>ratio, 95% CI<br>MHDs<15 | Prevalence odds<br>ratio, 95% CI<br>MHDs≥15 | Migraine patients<br>MHDs≥15<br>(N=107) |       | Matched non-migraine<br>respondents<br>(N=428) |      |
|--------------------------------|-----------------------------------------|-------|--------------------------------------------------|------|---------------------------------------------|---------------------------------------------|-----------------------------------------|-------|------------------------------------------------|------|
|                                | Count                                   | %     | Count                                            | %    |                                             |                                             | Count                                   | %     | Count                                          | %    |
| <b>ADD</b>                     | 9                                       | 2.4%  | 10                                               | 0.7% | 3.7 (1.3, 10.1)                             | 6.1 (0.7, 73.9)                             | 3                                       | 2.8%  | 2                                              | 0.5% |
| <b>ADHD</b>                    | 6                                       | 1.6%  | 8                                                | 0.5% | 3.0 (0.9, 10.0)                             | 12.3 (1.0, 645.5)                           | 3                                       | 2.8%  | 1                                              | 0.2% |
| <b>Schizophrenia</b>           | 14                                      | 3.7%  | 24                                               | 1.6% | 2.4 (1.1, 4.9)                              | 5.0 (1.3, 21.2)                             | 6                                       | 5.6%  | 5                                              | 1.2% |
| <b>Bipolar disorder</b>        | 10                                      | 2.6%  | 21                                               | 1.4% | 1.9 (0.8, 4.3)                              | 3.0 (0.7, 11.0)                             | 5                                       | 4.7%  | 7                                              | 1.6% |
| <b>Depression</b>              | 84                                      | 22.2% | 136                                              | 9.0% | 2.9 (2.1, 3.9)                              | 6.5 (3.6, 11.6)                             | 36                                      | 33.6% | 31                                             | 7.2% |
| <b>Anxiety</b>                 | 55                                      | 14.6% | 45                                               | 3.0% | 5.6 (3.6, 8.6)                              | 9.5 (4.5, 20.5)                             | 26                                      | 24.3% | 14                                             | 3.3% |
| <b>Phobias</b>                 | 23                                      | 6.1%  | 12                                               | 0.8% | 8.1 (3.8, 18.0)                             | 17.2 (3.3, 167.4)                           | 8                                       | 7.5%  | 2                                              | 0.5% |
| <b>Social anxiety disorder</b> | 43                                      | 11.4% | 39                                               | 2.6% | 4.9 (3.0, 7.8)                              | 6.7 (2.8, 16.4)                             | 16                                      | 15.0% | 11                                             | 2.6% |
| <b>Panic disorder</b>          | 52                                      | 13.8% | 44                                               | 2.9% | 5.3 (3.4, 8.3)                              | 12.1 (5.3, 29.2)                            | 24                                      | 22.4% | 10                                             | 2.3% |
| <b>GAD</b>                     | 32                                      | 8.5%  | 14                                               | 0.9% | 9.9 (5.1, 20.3)                             | 18.6 (5.8, 77.8)                            | 16                                      | 15.0% | 4                                              | 0.9% |
| <b>OCD</b>                     | 19                                      | 5.0%  | 15                                               | 1.0% | 5.3 (2.5, 11.3)                             | 11.5 (2.7, 67.6)                            | 8                                       | 7.5%  | 3                                              | 0.7% |
| <b>PTSD</b>                    | 29                                      | 7.7%  | 11                                               | 0.7% | 11.3 (5.4, 25.4)                            | 22.0 (4.5, 207.0)                           | 10                                      | 9.3%  | 2                                              | 0.5% |

ADD, attention deficit disorder; ADHD, attention deficit hyperactivity disorder; GAD, generalized anxiety disorder; OCD, obsessive compulsive disorder; PTSD, post-traumatic stress disorder.

**Supplementary Table 2. Propensity score-matched prevalence odds ratio for somatic comorbidities among patients with migraine with <15 monthly headache days vs. ≥15 monthly headache days**

|                                   | Migraine patients<br>MHDs<15<br>(N=271) |       | Matched non-<br>migraine respondents<br>(N=1,084) |       | Prevalence odds<br>ratio, 95% CI<br>MHDs<15 | Prevalence odds<br>ratio, 95% CI<br>MHDs≥15 | Migraine patients<br>MHDs≥15<br>(N=107) |       | Matched non-migraine<br>respondents<br>(N=428) |       |
|-----------------------------------|-----------------------------------------|-------|---------------------------------------------------|-------|---------------------------------------------|---------------------------------------------|-----------------------------------------|-------|------------------------------------------------|-------|
|                                   | Count                                   | %     | Count                                             | %     |                                             |                                             | Count                                   | %     | Count                                          | %     |
| <b>Gastrointestinal disorders</b> |                                         |       |                                                   |       |                                             |                                             |                                         |       |                                                |       |
| <b>GERD</b>                       | 43                                      | 15.9% | 74                                                | 6.8%  | 2.6 (1.7, 3.9)                              | 6.2 (3.5, 11.1)                             | 35                                      | 32.7% | 31                                             | 7.2%  |
| <b>Heartburn</b>                  | 104                                     | 38.4% | 180                                               | 16.6% | 3.1 (2.3, 4.2)                              | 5.1 (3.2, 8.2)                              | 57                                      | 53.3% | 78                                             | 18.2% |
| <b>Ulcers</b>                     | 28                                      | 10.3% | 45                                                | 4.2%  | 2.7 (1.6, 4.5)                              | 4.5 (2.0, 10.2)                             | 15                                      | 14.0% | 15                                             | 3.5%  |
| <b>Crohn's disease</b>            | 0                                       | 0.0%  | 2                                                 | 0.2%  | 0.0 (0.0, 21.3)                             | 0.0 (0.0, 155.6)                            | 0                                       | 0.0%  | 1                                              | 0.2%  |
| <b>Ulcerative colitis</b>         | 4                                       | 1.5%  | 6                                                 | 0.6%  | 2.7 (0.6, 11.4)                             | 16.6 (1.6, 814.6)                           | 4                                       | 3.7%  | 1                                              | 0.2%  |
| <b>Irritable bowel Syndrome</b>   | 45                                      | 16.6% | 71                                                | 6.5%  | 2.8 (1.9, 4.3)                              | 7.6 (3.9, 14.6)                             | 30                                      | 28.0% | 21                                             | 4.9%  |
| <b>Chronic constipation (12m)</b> | 74                                      | 27.3% | 141                                               | 13.0% | 2.5 (1.8, 3.5)                              | 2.5 (1.5, 4.2)                              | 35                                      | 32.7% | 69                                             | 16.1% |
| <b>Frequent diarrhea (12m)</b>    | 64                                      | 23.6% | 118                                               | 10.9% | 2.53 (1.8, 3.6)                             | 4.9 (2.8, 8.4)                              | 35                                      | 32.7% | 39                                             | 9.1%  |
| <b>Allergic-related disorders</b> |                                         |       |                                                   |       |                                             |                                             |                                         |       |                                                |       |
| <b>Allergies (12m)</b>            | 115                                     | 42.4% | 202                                               | 18.6% | 3.2 (2.4, 4.3)                              | 2.4 (1.5, 3.9)                              | 48                                      | 44.9% | 107                                            | 25.0% |
| <b>Atopic dermatitis</b>          | 53                                      | 19.6% | 121                                               | 11.2% | 1.9 (1.3, 2.8)                              | 2.2 (1.2, 4.0)                              | 21                                      | 19.6% | 43                                             | 10.0% |
| <b>Hay fever</b>                  | 117                                     | 43.2% | 217                                               | 20.0% | 3.0 (2.3, 4.1)                              | 2.5 (1.6, 3.9)                              | 50                                      | 46.7% | 112                                            | 26.2% |
| <b>Asthma</b>                     | 42                                      | 15.5% | 88                                                | 8.1%  | 2.1 (1.4, 3.1)                              | 2.5 (1.4, 4.5)                              | 24                                      | 22.4% | 44                                             | 10.3% |
| <b>Sleep disorders</b>            |                                         |       |                                                   |       |                                             |                                             |                                         |       |                                                |       |
| <b>Insomnia</b>                   | 83                                      | 30.6% | 119                                               | 11.0% | 3.6 (2.6, 5.0)                              | 6.7 (4.0, 11.2)                             | 51                                      | 47.7% | 51                                             | 11.9% |
| <b>Sleep apnea</b>                | 13                                      | 4.8%  | 21                                                | 1.9%  | 2.6 (1.2, 5.4)                              | 2.7 (0.2, 23.8)                             | 2                                       | 1.9%  | 3                                              | 0.7%  |
| <b>Sleep difficulties</b>         | 31                                      | 11.4% | 37                                                | 3.4%  | 3.7 (2.1, 6.2)                              | 5.2 (2.3, 11.6)                             | 17                                      | 15.9% | 15                                             | 3.5%  |
| <b>Gynecological disorders</b>    |                                         |       |                                                   |       |                                             |                                             |                                         |       |                                                |       |

|                                               |    |       |     |       |                  |                  |    |       |    |       |
|-----------------------------------------------|----|-------|-----|-------|------------------|------------------|----|-------|----|-------|
| <b>Fibroids</b>                               | 34 | 12.5% | 91  | 8.4%  | 1.6 (1.0, 2.4)   | 1.8 (1.2, 2.6)   | 15 | 14.0% | 28 | 6.5%  |
| <b>Pre-menstrual dysphoric disorder (12m)</b> | 38 | 14.0% | 40  | 3.7%  | 4.4 (2.6, 7.2)   | 5.5 (3.6, 8.4)   | 22 | 20.6% | 12 | 2.8%  |
| <b>Pre-menstrual syndrome (12m)</b>           | 64 | 23.6% | 64  | 5.9%  | 5.2 (3.5, 7.8)   | 5.3 (3.8, 7.4)   | 33 | 30.8% | 34 | 7.9%  |
| <b>Endometriosis</b>                          | 22 | 8.1%  | 47  | 4.3%  | 2.0 (1.1, 3.4)   | 2.4 (1.5, 3.7)   | 14 | 13.1% | 18 | 4.2%  |
| <b>Cardiovascular disorders</b>               |    |       |     |       |                  |                  |    |       |    |       |
| <b>High blood pressure (hypertension)</b>     | 24 | 8.9%  | 76  | 7.0%  | 1.3 (0.8, 2.1)   | 0.5 (0.1, 1.6)   | 4  | 3.7%  | 29 | 6.8%  |
| <b>Heart attack</b>                           | 3  | 1.1%  | 3   | 0.3%  | 4.0 (0.5, 30.3)  | NA               | 0  | 0.0%  | 0  | 0.0%  |
| <b>Mini-stroke/TIA</b>                        | 1  | 0.4%  | 4   | 0.4%  | 1.0 (0.02, 10.2) | Inf (0.1, Inf)   | 1  | 0.9%  | 0  | 0.0%  |
| <b>Stroke</b>                                 | 2  | 0.7%  | 2   | 0.2%  | 4.0 (0.3, 55.6)  | NA               | 0  | 0.0%  | 0  | 0.0%  |
| <b>Others</b>                                 |    |       |     |       |                  |                  |    |       |    |       |
| <b>Rheumatoid arthritis</b>                   | 4  | 1.5%  | 13  | 1.2%  | 1.2 (0.3, 4.0)   | 1.3 (0.03, 16.8) | 1  | 0.9%  | 3  | 0.7%  |
| <b>Lupus</b>                                  | 2  | 0.7%  | 2   | 0.2%  | 4.0 (0.3, 10.2)  | 0.0 (0.0, 9.7)   | 0  | 0.0%  | 3  | 0.7%  |
| <b>Fibromyalgia (12m)</b>                     | 3  | 1.1%  | 2   | 0.2%  | 6.1 (0.7, 72.6)  | Inf (1.7, Inf)   | 3  | 2.8%  | 0  | 0.0%  |
| <b>Parkinson's disease</b>                    | 1  | 0.4%  | 3   | 0.3%  | 1.3 (0.03, 16.7) | NA               | 0  | 0.0%  | 0  | 0.0%  |
| <b>Restless leg syndrome (12m)</b>            | 14 | 5.2%  | 25  | 2.3%  | 2.3 (1.1, 4.7)   | 4.9 (1.5, 16.1)  | 8  | 7.5%  | 7  | 1.6%  |
| <b>Epilepsy</b>                               | 2  | 0.7%  | 6   | 0.6%  | 1.3 (0.1, 7.5)   | 1.6 (0.2, 10.0)  | 2  | 1.9%  | 5  | 1.2%  |
| <b>Anemia (12m)</b>                           | 58 | 21.4% | 121 | 11.2% | 2.2 (1.5, 3.1)   | 2.6 (1.5, 4.4)   | 30 | 28.0% | 56 | 13.1% |
| <b>Thyroid condition</b>                      | 14 | 5.2%  | 23  | 2.1%  | 2.5 (1.2, 5.2)   | 3.8 (1.2, 11.3)  | 8  | 7.5%  | 9  | 2.1%  |
| <b>Genital warts</b>                          | 2  | 0.7%  | 1   | 0.1%  | 8.1 (0.4, 474.0) | NA               | 0  | 0.0%  | 0  | 0.0%  |
| <b>Genital herpes</b>                         | 5  | 1.8%  | 6   | 0.6%  | 3.4 (0.8, 13.4)  | 2.0 (0.03, 38.8) | 1  | 0.9%  | 2  | 0.5%  |
| <b>Breast cancer</b>                          | 3  | 1.1%  | 18  | 1.7%  | 0.7 (0.1, 2.3)   | 6.1 (0.7, 73.9)  | 3  | 2.8%  | 2  | 0.5%  |

**STROBE 2007 (v4) Statement—Checklist of items that should be included in reports of *cross-sectional studies***

| Section/Topic                | Item # | Recommendation                                                                                                                                                                       | Reported on page # |
|------------------------------|--------|--------------------------------------------------------------------------------------------------------------------------------------------------------------------------------------|--------------------|
| <b>Title and abstract</b>    | 1      | (a) Indicate the study's design with a commonly used term in the title or the abstract                                                                                               | 1 & 2              |
|                              |        | (b) Provide in the abstract an informative and balanced summary of what was done and what was found                                                                                  | 2-3                |
| <b>Introduction</b>          |        |                                                                                                                                                                                      |                    |
| Background/rationale         | 2      | Explain the scientific background and rationale for the investigation being reported                                                                                                 | 4                  |
| Objectives                   | 3      | State specific objectives, including any prespecified hypotheses                                                                                                                     | 4                  |
| <b>Methods</b>               |        |                                                                                                                                                                                      | 5-7                |
| Study design                 | 4      | Present key elements of study design early in the paper                                                                                                                              | 5                  |
| Setting                      | 5      | Describe the setting, locations, and relevant dates, including periods of recruitment, exposure, follow-up, and data collection                                                      | 5                  |
| Participants                 | 6      | (a) Give the eligibility criteria, and the sources and methods of selection of participants                                                                                          | 5                  |
| Variables                    | 7      | Clearly define all outcomes, exposures, predictors, potential confounders, and effect modifiers. Give diagnostic criteria, if applicable                                             | 6                  |
| Data sources/<br>measurement | 8*     | For each variable of interest, give sources of data and details of methods of assessment (measurement). Describe comparability of assessment methods if there is more than one group | 6                  |
| Bias                         | 9      | Describe any efforts to address potential sources of bias                                                                                                                            | NA                 |
| Study size                   | 10     | Explain how the study size was arrived at                                                                                                                                            | NA                 |
| Quantitative variables       | 11     | Explain how quantitative variables were handled in the analyses. If applicable, describe which groupings were chosen and why                                                         | 7                  |
| Statistical methods          | 12     | (a) Describe all statistical methods, including those used to control for confounding                                                                                                | 7                  |
|                              |        | (b) Describe any methods used to examine subgroups and interactions                                                                                                                  | 7                  |
|                              |        | (c) Explain how missing data were addressed                                                                                                                                          | NA                 |
|                              |        | (d) If applicable, describe analytical methods taking account of sampling strategy                                                                                                   | 7                  |
|                              |        | (e) Describe any sensitivity analyses                                                                                                                                                | NA                 |
| <b>Results</b>               |        |                                                                                                                                                                                      |                    |

|                          |     |                                                                                                                                                                                                              |               |
|--------------------------|-----|--------------------------------------------------------------------------------------------------------------------------------------------------------------------------------------------------------------|---------------|
| Participants             | 13* | (a) Report numbers of individuals at each stage of study—eg numbers potentially eligible, examined for eligibility, confirmed eligible, included in the study, completing follow-up, and analysed            | 8             |
|                          |     | (b) Give reasons for non-participation at each stage                                                                                                                                                         | NA            |
|                          |     | (c) Consider use of a flow diagram                                                                                                                                                                           | 8 (Figure 1)  |
| Descriptive data         | 14* | (a) Give characteristics of study participants (eg demographic, clinical, social) and information on exposures and potential confounders                                                                     | 8-9 (Table 1) |
|                          |     | (b) Indicate number of participants with missing data for each variable of interest                                                                                                                          | NA            |
| Outcome data             | 15* | Report numbers of outcome events or summary measures                                                                                                                                                         | 8-12          |
| Main results             | 16  | (a) Give unadjusted estimates and, if applicable, confounder-adjusted estimates and their precision (eg, 95% confidence interval). Make clear which confounders were adjusted for and why they were included | 8-12          |
|                          |     | (b) Report category boundaries when continuous variables were categorized                                                                                                                                    | 8-12          |
|                          |     | (c) If relevant, consider translating estimates of relative risk into absolute risk for a meaningful time period                                                                                             | NA            |
| Other analyses           | 17  | Report other analyses done—eg analyses of subgroups and interactions, and sensitivity analyses                                                                                                               | 12            |
| <b>Discussion</b>        |     |                                                                                                                                                                                                              | 13-17         |
| Key results              | 18  | Summarise key results with reference to study objectives                                                                                                                                                     | 13            |
| Limitations              | 19  | Discuss limitations of the study, taking into account sources of potential bias or imprecision. Discuss both direction and magnitude of any potential bias                                                   | 16-17         |
| Interpretation           | 20  | Give a cautious overall interpretation of results considering objectives, limitations, multiplicity of analyses, results from similar studies, and other relevant evidence                                   | 16-17         |
| Generalisability         | 21  | Discuss the generalisability (external validity) of the study results                                                                                                                                        | 16-17         |
| <b>Other information</b> |     |                                                                                                                                                                                                              |               |
| Funding                  | 22  | Give the source of funding and the role of the funders for the present study and, if applicable, for the original study on which the present article is based                                                | 18            |
|                          |     |                                                                                                                                                                                                              |               |

\*Give information separately for cases and controls in case-control studies and, if applicable, for exposed and unexposed groups in cohort and cross-sectional studies.

**Note:** An Explanation and Elaboration article discusses each checklist item and gives methodological background and published examples of transparent reporting. The STROBE checklist is best used in conjunction with this article (freely available on the Web sites of PLoS Medicine at <http://www.plosmedicine.org/>, Annals of Internal Medicine at <http://www.annals.org/>, and Epidemiology at <http://www.epidem.com/>). Information on the STROBE Initiative is available at [www.strobe-statement.org](http://www.strobe-statement.org).
