# Supplementary material for: Comorbidities in patients with migraine in Japan: a cross-sectional study using data from National Health and Wellness Survey
Source: PubMed Central journal article supplement — BMJ Open. 2022 Nov 30;12(11):e065787. doi: 10.1136/bmjopen-2022-065787 (PMC9716839; doi:10.1136/bmjopen-2022-065787), 2022-11-30
Supplement: bmjopen-2022-065787supp001.pdf [file bmjopen-2022-065787supp001.pdf]

**Supplementary Table 1. Propensity score-matched prevalence odds ratio for psychiatric comorbidities among patients with migraine with <15 monthly headache days vs. ≥15 monthly headache days**

|                                | Migraine patients<br>MHDs<15<br>(N=271) |       | Matched non-migraine<br>respondents<br>(N=1,084) |      | Prevalence odds<br>ratio, 95% CI<br>MHDs<15 | Prevalence odds<br>ratio, 95% CI<br>MHDs≥15 | Migraine patients<br>MHDs≥15<br>(N=107) |       | Matched non-migraine<br>respondents<br>(N=428) |      |
|--------------------------------|-----------------------------------------|-------|--------------------------------------------------|------|---------------------------------------------|---------------------------------------------|-----------------------------------------|-------|------------------------------------------------|------|
|                                | Count                                   | %     | Count                                            | %    |                                             |                                             | Count                                   | %     | Count                                          | %    |
| <b>ADD</b>                     | 9                                       | 2.4%  | 10                                               | 0.7% | 3.7 (1.3, 10.1)                             | 6.1 (0.7, 73.9)                             | 3                                       | 2.8%  | 2                                              | 0.5% |
| <b>ADHD</b>                    | 6                                       | 1.6%  | 8                                                | 0.5% | 3.0 (0.9, 10.0)                             | 12.3 (1.0, 645.5)                           | 3                                       | 2.8%  | 1                                              | 0.2% |
| <b>Schizophrenia</b>           | 14                                      | 3.7%  | 24                                               | 1.6% | 2.4 (1.1, 4.9)                              | 5.0 (1.3, 21.2)                             | 6                                       | 5.6%  | 5                                              | 1.2% |
| <b>Bipolar disorder</b>        | 10                                      | 2.6%  | 21                                               | 1.4% | 1.9 (0.8, 4.3)                              | 3.0 (0.7, 11.0)                             | 5                                       | 4.7%  | 7                                              | 1.6% |
| <b>Depression</b>              | 84                                      | 22.2% | 136                                              | 9.0% | 2.9 (2.1, 3.9)                              | 6.5 (3.6, 11.6)                             | 36                                      | 33.6% | 31                                             | 7.2% |
| <b>Anxiety</b>                 | 55                                      | 14.6% | 45                                               | 3.0% | 5.6 (3.6, 8.6)                              | 9.5 (4.5, 20.5)                             | 26                                      | 24.3% | 14                                             | 3.3% |
| <b>Phobias</b>                 | 23                                      | 6.1%  | 12                                               | 0.8% | 8.1 (3.8, 18.0)                             | 17.2 (3.3, 167.4)                           | 8                                       | 7.5%  | 2                                              | 0.5% |
| <b>Social anxiety disorder</b> | 43                                      | 11.4% | 39                                               | 2.6% | 4.9 (3.0, 7.8)                              | 6.7 (2.8, 16.4)                             | 16                                      | 15.0% | 11                                             | 2.6% |
| <b>Panic disorder</b>          | 52                                      | 13.8% | 44                                               | 2.9% | 5.3 (3.4, 8.3)                              | 12.1 (5.3, 29.2)                            | 24                                      | 22.4% | 10                                             | 2.3% |
| <b>GAD</b>                     | 32                                      | 8.5%  | 14                                               | 0.9% | 9.9 (5.1, 20.3)                             | 18.6 (5.8, 77.8)                            | 16                                      | 15.0% | 4                                              | 0.9% |
| <b>OCD</b>                     | 19                                      | 5.0%  | 15                                               | 1.0% | 5.3 (2.5, 11.3)                             | 11.5 (2.7, 67.6)                            | 8                                       | 7.5%  | 3                                              | 0.7% |
| <b>PTSD</b>                    | 29                                      | 7.7%  | 11                                               | 0.7% | 11.3 (5.4, 25.4)                            | 22.0 (4.5, 207.0)                           | 10                                      | 9.3%  | 2                                              | 0.5% |

ADD, attention deficit disorder; ADHD, attention deficit hyperactivity disorder; GAD, generalized anxiety disorder; OCD, obsessive compulsive disorder; PTSD, post-traumatic stress disorder.

**Supplementary Table 2. Propensity score-matched prevalence odds ratio for somatic comorbidities among patients with migraine with <15 monthly headache days vs. ≥15 monthly headache days**

|                                   | Migraine patients<br>MHDs<15<br>(N=271) |       | Matched non-<br>migraine respondents<br>(N=1,084) |       | Prevalence odds<br>ratio, 95% CI<br>MHDs<15 | Prevalence odds<br>ratio, 95% CI<br>MHDs≥15 | Migraine patients<br>MHDs≥15<br>(N=107) |       | Matched non-migraine<br>respondents<br>(N=428) |       |
|-----------------------------------|-----------------------------------------|-------|---------------------------------------------------|-------|---------------------------------------------|---------------------------------------------|-----------------------------------------|-------|------------------------------------------------|-------|
|                                   | Count                                   | %     | Count                                             | %     |                                             |                                             | Count                                   | %     | Count                                          | %     |
| <b>Gastrointestinal disorders</b> |                                         |       |                                                   |       |                                             |                                             |                                         |       |                                                |       |
| GERD                              | 43                                      | 15.9% | 74                                                | 6.8%  | 2.6 (1.7, 3.9)                              | 6.2 (3.5, 11.1)                             | 35                                      | 32.7% | 31                                             | 7.2%  |
| Heartburn                         | 104                                     | 38.4% | 180                                               | 16.6% | 3.1 (2.3, 4.2)                              | 5.1 (3.2, 8.2)                              | 57                                      | 53.3% | 78                                             | 18.2% |
| Ulcers                            | 28                                      | 10.3% | 45                                                | 4.2%  | 2.7 (1.6, 4.5)                              | 4.5 (2.0, 10.2)                             | 15                                      | 14.0% | 15                                             | 3.5%  |
| Crohn's disease                   | 0                                       | 0.0%  | 2                                                 | 0.2%  | 0.0 (0.0, 21.3)                             | 0.0 (0.0, 155.6)                            | 0                                       | 0.0%  | 1                                              | 0.2%  |
| Ulcerative colitis                | 4                                       | 1.5%  | 6                                                 | 0.6%  | 2.7 (0.6, 11.4)                             | 16.6 (1.6, 814.6)                           | 4                                       | 3.7%  | 1                                              | 0.2%  |
| Irritable bowel Syndrome          | 45                                      | 16.6% | 71                                                | 6.5%  | 2.8 (1.9, 4.3)                              | 7.6 (3.9, 14.6)                             | 30                                      | 28.0% | 21                                             | 4.9%  |
| Chronic constipation (12m)        | 74                                      | 27.3% | 141                                               | 13.0% | 2.5 (1.8, 3.5)                              | 2.5 (1.5, 4.2)                              | 35                                      | 32.7% | 69                                             | 16.1% |
| Frequent diarrhea (12m)           | 64                                      | 23.6% | 118                                               | 10.9% | 2.53 (1.8, 3.6)                             | 4.9 (2.8, 8.4)                              | 35                                      | 32.7% | 39                                             | 9.1%  |
| <b>Allergic-related disorders</b> |                                         |       |                                                   |       |                                             |                                             |                                         |       |                                                |       |
| Allergies (12m)                   | 115                                     | 42.4% | 202                                               | 18.6% | 3.2 (2.4, 4.3)                              | 2.4 (1.5, 3.9)                              | 48                                      | 44.9% | 107                                            | 25.0% |
| Atopic dermatitis                 | 53                                      | 19.6% | 121                                               | 11.2% | 1.9 (1.3, 2.8)                              | 2.2 (1.2, 4.0)                              | 21                                      | 19.6% | 43                                             | 10.0% |
| Hay fever                         | 117                                     | 43.2% | 217                                               | 20.0% | 3.0 (2.3, 4.1)                              | 2.5 (1.6, 3.9)                              | 50                                      | 46.7% | 112                                            | 26.2% |
| Asthma                            | 42                                      | 15.5% | 88                                                | 8.1%  | 2.1 (1.4, 3.1)                              | 2.5 (1.4, 4.5)                              | 24                                      | 22.4% | 44                                             | 10.3% |
| <b>Sleep disorders</b>            |                                         |       |                                                   |       |                                             |                                             |                                         |       |                                                |       |
| Insomnia                          | 83                                      | 30.6% | 119                                               | 11.0% | 3.6 (2.6, 5.0)                              | 6.7 (4.0, 11.2)                             | 51                                      | 47.7% | 51                                             | 11.9% |
| Sleep apnea                       | 13                                      | 4.8%  | 21                                                | 1.9%  | 2.6 (1.2, 5.4)                              | 2.7 (0.2, 23.8)                             | 2                                       | 1.9%  | 3                                              | 0.7%  |
| Sleep difficulties                | 31                                      | 11.4% | 37                                                | 3.4%  | 3.7 (2.1, 6.2)                              | 5.2 (2.3, 11.6)                             | 17                                      | 15.9% | 15                                             | 3.5%  |
| <b>Gynecological disorders</b>    |                                         |       |                                                   |       |                                             |                                             |                                         |       |                                                |       |

|                                               |    |       |     |       |                  |                  |    |       |    |       |
|-----------------------------------------------|----|-------|-----|-------|------------------|------------------|----|-------|----|-------|
| <b>Fibroids</b>                               | 34 | 12.5% | 91  | 8.4%  | 1.6 (1.0, 2.4)   | 1.8 (1.2, 2.6)   | 15 | 14.0% | 28 | 6.5%  |
| <b>Pre-menstrual dysphoric disorder (12m)</b> | 38 | 14.0% | 40  | 3.7%  | 4.4 (2.6, 7.2)   | 5.5 (3.6, 8.4)   | 22 | 20.6% | 12 | 2.8%  |
| <b>Pre-menstrual syndrome (12m)</b>           | 64 | 23.6% | 64  | 5.9%  | 5.2 (3.5, 7.8)   | 5.3 (3.8, 7.4)   | 33 | 30.8% | 34 | 7.9%  |
| <b>Endometriosis</b>                          | 22 | 8.1%  | 47  | 4.3%  | 2.0 (1.1, 3.4)   | 2.4 (1.5, 3.7)   | 14 | 13.1% | 18 | 4.2%  |
| <b>Cardiovascular disorders</b>               |    |       |     |       |                  |                  |    |       |    |       |
| <b>High blood pressure (hypertension)</b>     | 24 | 8.9%  | 76  | 7.0%  | 1.3 (0.8, 2.1)   | 0.5 (0.1, 1.6)   | 4  | 3.7%  | 29 | 6.8%  |
| <b>Heart attack</b>                           | 3  | 1.1%  | 3   | 0.3%  | 4.0 (0.5, 30.3)  | NA               | 0  | 0.0%  | 0  | 0.0%  |
| <b>Mini-stroke/TIA</b>                        | 1  | 0.4%  | 4   | 0.4%  | 1.0 (0.02, 10.2) | Inf (0.1, Inf)   | 1  | 0.9%  | 0  | 0.0%  |
| <b>Stroke</b>                                 | 2  | 0.7%  | 2   | 0.2%  | 4.0 (0.3, 55.6)  | NA               | 0  | 0.0%  | 0  | 0.0%  |
| <b>Others</b>                                 |    |       |     |       |                  |                  |    |       |    |       |
| <b>Rheumatoid arthritis</b>                   | 4  | 1.5%  | 13  | 1.2%  | 1.2 (0.3, 4.0)   | 1.3 (0.03, 16.8) | 1  | 0.9%  | 3  | 0.7%  |
| <b>Lupus</b>                                  | 2  | 0.7%  | 2   | 0.2%  | 4.0 (0.3, 10.2)  | 0.0 (0.0, 9.7)   | 0  | 0.0%  | 3  | 0.7%  |
| <b>Fibromyalgia (12m)</b>                     | 3  | 1.1%  | 2   | 0.2%  | 6.1 (0.7, 72.6)  | Inf (1.7, Inf)   | 3  | 2.8%  | 0  | 0.0%  |
| <b>Parkinson's disease</b>                    | 1  | 0.4%  | 3   | 0.3%  | 1.3 (0.03, 16.7) | NA               | 0  | 0.0%  | 0  | 0.0%  |
| <b>Restless leg syndrome (12m)</b>            | 14 | 5.2%  | 25  | 2.3%  | 2.3 (1.1, 4.7)   | 4.9 (1.5, 16.1)  | 8  | 7.5%  | 7  | 1.6%  |
| <b>Epilepsy</b>                               | 2  | 0.7%  | 6   | 0.6%  | 1.3 (0.1, 7.5)   | 1.6 (0.2, 10.0)  | 2  | 1.9%  | 5  | 1.2%  |
| <b>Anemia (12m)</b>                           | 58 | 21.4% | 121 | 11.2% | 2.2 (1.5, 3.1)   | 2.6 (1.5, 4.4)   | 30 | 28.0% | 56 | 13.1% |
| <b>Thyroid condition</b>                      | 14 | 5.2%  | 23  | 2.1%  | 2.5 (1.2, 5.2)   | 3.8 (1.2, 11.3)  | 8  | 7.5%  | 9  | 2.1%  |
| <b>Genital warts</b>                          | 2  | 0.7%  | 1   | 0.1%  | 8.1 (0.4, 474.0) | NA               | 0  | 0.0%  | 0  | 0.0%  |
| <b>Genital herpes</b>                         | 5  | 1.8%  | 6   | 0.6%  | 3.4 (0.8, 13.4)  | 2.0 (0.03, 38.8) | 1  | 0.9%  | 2  | 0.5%  |
| <b>Breast cancer</b>                          | 3  | 1.1%  | 18  | 1.7%  | 0.7 (0.1, 2.3)   | 6.1 (0.7, 73.9)  | 3  | 2.8%  | 2  | 0.5%  |
